## Peripheral kappa opioid receptor activation drives cold hypersensitivity in mice

Manish K. Madasu<sup>1,2,3</sup>, Loc V. Thang<sup>1,2,3</sup>, Priyanka Chilukuri<sup>1,3</sup>, Sree Palanisamy<sup>1,2</sup>, Joel S. Arackal<sup>1,2</sup>, Tayler D. Sheahan<sup>3,4</sup>, Audra M. Foshage<sup>3</sup>, Richard A. Houghten<sup>6</sup>, Jay P. McLaughlin<sup>5,6</sup>, Jordan G. McCall<sup>1,2,3</sup>, Ream Al-Hasani<sup>1,2,3</sup>

<sup>1</sup>Center for Clinical Pharmacology, University of Health Sciences and Pharmacy and Washington University School of Medicine, St. Louis, MO, USA. <sup>2</sup>Department of Pharmaceutical and Administrative Sciences, University of Health Sciences and Pharmacy, St. Louis, MO, USA. <sup>3</sup>Department of Anesthesiology, Pain Center, Washington University. St. Louis, MO, USA. <sup>4</sup>Division of Biology and Biomedical Science, Washington University in St. Louis, MO, USA. <sup>5</sup>Department of Pharmacodynamics, University of Florida, Gainesville, FL, USA. <sup>6</sup>Torrey Pines Institute for Molecular Studies, Port St. Lucie, FL, USA

Corresponding Author:

Dr. Ream Al-Hasani  
Center for Clinical Pharmacology  
University of Health Sciences and Pharmacy  
Washington University School of Medicine  
660 South Euclid  
Campus Box 8054  
St. Louis  
MO, 63110  
[al-hasanir@wustl.edu](mailto:al-hasanir@wustl.edu)

## Abstract:

Cold hypersensitivity is commonly associated with peripheral neuropathies but remains largely untreated due to limited understanding of its neurobiological mechanisms. Here we identify a role for kappa opioid receptors (KOR) in driving cold hypersensitivity. First, we show that systemic activation of KOR by the agonist U50,488 (U50), increases the latency to jump and the number of jumps on a cold plate at 3°C. Likewise, NorBNI, a KOR antagonist, attenuates U50-induced cold hypersensitivity. However, central administration of NorBNI does not block U50-induced cold hypersensitivity, suggesting that peripheral KORs may modulate this effect. To directly test this hypothesis, we use the peripherally-restricted KOR agonist, ff(nle)r-NH<sub>2</sub> to demonstrate that selective activation of peripheral KOR is sufficient to induce cold hypersensitivity. To begin to understand how peripheral KORs drive cold hypersensitivity we investigated whether KORs interact with transient receptor potential ankyrin 1 (TRPA1) channels, known to facilitate the noxious cold sensation, in dorsal root ganglia (DRG) sensory neurons. Using fluorescent *in situ* hybridization, we show that KOR mRNA colocalizes with the transcripts for the cold-activated TRPA1 channels in DRG. Furthermore, U50 potentiates DRG intracellular calcium release during the simultaneous application of the TRPA1 agonist, mustard oil (MO). Together our data suggest that peripheral KORs may induce cold hypersensitivity by enhancing TRPA1 activation. These studies position the KOR system as an important modulator of cold sensation, offering a new potential point of intervention for reducing cold hypersensitivity.

Keywords: kappa opioid receptor (KOR), Transient receptor potential ankyrin 1 (TRPA1), cold sensitivity, Transient receptor potential melastatin 8 (TRPM8)

## Introduction

Cold sensitivity is an elusive condition that has previously been defined as an exaggerated or abnormal reaction to cold exposure, causing discomfort or the avoidance of cold (Kay, 1985). Cold hypersensitivity is often associated with neuropathic pain from disorders such as multiple sclerosis, fibromyalgia, complex regional pain syndrome, and chemotherapy-induced peripheral neuropathy (Attal et al., 2009; Christogianni et al., 2018; Jensen and Finnerup, 2014; Tajerian and Clark, 2016; Wilbarger and Cook, 2011). 15% to 50% of neuropathic pain patients often experience heightened sensory abnormalities (Jensen & Finnerup, 2014). Medications used to treat neuropathic pain are predominantly non-steroidal anti-inflammatory drugs (NSAIDs), mu opioid agonists, and anti-epileptics (Kudel et al., 2019), all which have very limited success in relieving cold hypersensitivity.

While less is known about cold pain, significantly more is known about cold sensation, particularly how it is regulated by transient receptor potential (TRP) channels, TRPA1 and TRPM8 in DRG (Bautista et al., 2006; Dhaka et al., 2008; McKemy et al., 2002a; Patapoutian et al., 2009; Pogorzala et al., 2013; Story et al., 2003). Most recently, it was shown that blocking K<sub>v</sub>1 potassium channels on large-diameter neurons in the periphery potentiated cold hypersensitivity in chronic pain states (MacDonald et al., 2020a). Similarly loss of Na<sub>v</sub>1.9 sodium channel (Na<sub>v</sub>1.9<sup>-/-</sup> mice) known to predominantly express in DRG significantly attenuated chemotherapy-induced cold allodynia (Lolignier et al., 2015). Interestingly, there is also some evidence implicating G protein-coupled receptors (GPCR) in sensing noxious, irritating, and inflammatory stimulants (Veldhuis et al., 2015) in tandem with TRP channels (Clapham, 2003). Together, these studies not only highlight the complex nature of cold-sensing mechanisms but also that these mechanisms likely differ depending on the type of cold pain.

In addition to GPCRs that may function as sensors, numerous GPCRs are known to regulate all forms of noxious sensation. Most notably, multiple opioid receptor subtypes are powerfully antinociceptive and analgesic. Beyond canonical mu opioid-mediated analgesia, activation of the kappa opioid receptor GPCR system is antinociceptive for noxious heat stimuli, analgesic in chronic pain models, and drives pain-induced negative affect (Horan and Porreca, 1993; Liu et al., 2019; Massaly et al., 2019). Recent evidence suggests that centrally- and peripherally-expressed KOR modulate different behaviors. For example, our group and others have shown that central KOR activation and upregulation modulates negative affect associated with peripheral nerve injury and inflammatory pain models (Liu et al., 2019; Massaly et al., 2019). Conversely, recent studies suggest peripherally-restricted KOR agonists selectively inhibit chemical pain and mechanical hypersensitivity associated with capsaicin-induced neurogenic inflammatory pain model and a surgical incision model, respectively (Snyder et al., 2018). Together these findings highlight the complex role of the KOR system in different pain and sensation modalities.

Here we add another dimension to the complex role of KOR by uncovering a role for KORs in cold hypersensitivity in mice. We use pharmacological approaches to determine that peripheral KORs regulate this induced cold hypersensitivity. We use *in situ* hybridization to show that KORs colocalize with TRPA1 and TRPM8 in the DRG. Finally,

we use calcium imaging to demonstrate that KOR activation potentiates TRPA1-dependent calcium signaling in DRG neurons. In sum, we show that peripheral KOR activation enhances cold sensitivity and this behavior is likely mediated through potentiated TRPA1 activity.

## Methods

### Animals

Adult C57BL/6J male and female mice (25-30 g) were used for all the behavioral and *in situ* hybridization experiments. For calcium imaging experiments, we used TRPA1<sup>-/-</sup> male and C57BL/6J male mice. All animals were 9 to 12 weeks at the beginning of the experiments. Mice were group-housed together with a 12/12 h dark/light cycle, given access to food pellets and water ad libitum (lights were turned on at 6:00 AM). Following weaning, all animals were transferred to a holding facility adjacent to the lab and acclimated to this animal facility for at least seven days before the experiments to minimize stress. Furthermore, all animals were acclimated to the behavior test room for at least two hours prior to each experiment. All procedures were approved by the Washington University in St. Louis Institutional Animal Care and Use Committee (IACUC) in accordance with the National Institutes of Health Guidelines for the Care and Use of Laboratory Animals.

### Drugs

U50,488 (U50, KOR agonist, 5 mg/kg i.p.) (CAS# 67197-96-0) and nor-Binaltorphimine dihydrochloride (norBNI, KOR antagonist, 10 mg/kg, i.p.) (CAS# 113158-34-2) were obtained from Tocris and dissolved in 0.9% sterile saline. Morphine sulfate (mu-opioid receptor (MOR) agonist, 10 mg/kg s.c.) procured from (McKesson #996806) was dissolved in 0.9% sterile saline. CR845 analogues (ff(nle)r-NH<sub>2</sub>) (peripherally-restricted KOR agonist, 10 mg/kg, i.p.) were generated in the McLaughlin lab (Alleyne et al, in revision) and dissolved 0.9% sterile saline.

### Hot/Cold Plate Assay

The hot/cold plate apparatus was adapted from the operant thermal plantar assay (Reker et al., 2020). The floor of the apparatus is made of one 12" × 12" × ¼" aluminum plate (3003, MetalsDepot), fixed to a cold plate Peltier (Cold plate cooler, CP-061, TE Technology). The Peltier device is independently controlled by a power supply (PS-12-8, 4A, TE Technology) and temperature controller (TC-48-20, TE Technology). Long Cast Acrylic Tubing (15' height, E-plastics) was used to contain the mice on the plate. Male and female C57BL/6J wildtype (WT) mice were habituated in plexiglass boxes for 30 mins prior to treatment with: 1) U50, KOR agonist, (5 mg/kg, i.p.) 2) norBNI, KOR antagonist (10 mg/kg, i.p.) 3) Saline (0.25ml) 4) CR845 peripherally-restricted KOR agonist (10 mg/kg i.p.). Following treatment, the mice were placed on the plate for 5 minutes, and the latency to jump and the number of jumps was recorded as nocifensive responses. The temperature of the plate varied from 3°C-42°C depending on the experiment. The plate's temperature was continuously monitored with a visual temperature strip (Liquid crystal

temperature indicating sheets-Telatemp) and a surface probe thermometer (Pro-surface thermopen-Thermoworks).

#### Rectal temperature measurements

Core body temperature readings were obtained using a homeothermic monitoring system attached to a flexible rectal probe (Physitemp instrument Inc. TCAT2LV controller). On the test day, mice were left to acclimate in the test room for 90 minutes. Post-habituation mice were injected with saline (0.25ml) or U50 (5 mg/kg i.p.) or ffler-NH<sub>2</sub> (10 mg/kg i.p.). Immediately post-injection, the mouse was hand-restrained and the tail lifted, and a lubricated probe gently inserted into the rectum to a fixed depth (typically, up to 1 cm) to obtain the rectal temperature. 30 minutes post-injection, the rectal temperatures were recorded. The depth of probe insertion was constant for each measurement.

#### Paw surface temperature measurements

Paw surface temperature readings were obtained using FLIR One Pro LT (Android version). On the test day, mice were left to acclimate in the test room for 90 minutes. Post-habituation mice were injected with saline (0.25ml) or U50 (5 mg/kg i.p.). Immediately post-injection, the mouse was hand-restrained and a thermal image was taken exposing the paws to obtain a clear reading of paw temperatures. 30 minutes post-injection, the paw surface temperatures were recorded. The images collected were processed on the FLIR one app (Windows10 64bit version) by drawing spots on the paws to assess the paw surface temperatures.

#### Tail withdrawal assay

Mice were habituated to the experimenter for a week prior to the assay and scuffed daily to minimize the stress that might impact the assay (Deuis et al., 2017). On experiment day, following U50 (5 mg/kg i.p.) or saline (0.25ml) injection, the mice were scuffed, and one-third of the distal end of the tail was immersed in the hot water bath set at 54.5°C. The time taken for the tail to twitch or flick was recorded. A single reading was recorded at 15, 30, 45, 60, 90, and 120 minutes following treatment.

#### Von Frey test

Mechanical sensitivity was determined using manual von Frey filaments following U50 (5 mg/kg i.p.) or Saline (0.25ml) treatments. On the test day, mice were individually placed in an acrylic cylinder on a mesh floor and covered with a rectangular acrylic lid to prevent them from escaping. The mice were habituated to apparatus for 2 hours prior to testing. During the assay, a monofilament was applied perpendicularly to the plantar surface of the hind paw for 2–5 seconds. If the animal exhibited any nocifensive behaviors, including brisk paw withdrawal, licking, or shaking of the paw, either during or immediately following the stimulus, a response is recorded. In that case, such a response is considered positive (Deuis et al., 2017). We used the "ascending stimulus" method, applying monofilaments with increasing force until it elicits withdrawal response. The von Frey filament force that elicits this positive response represents the mechanical withdrawal threshold. The stimulus was repeated for both the paws (three readings from each paw) and their mean calculated. A 10-minute break was included between each reading to prevent hypersensitivity.

## Acetone Evaporation Test

The acetone evaporation test was used to measure aversive behaviors triggered by evaporative cooling (Deuis et al., 2017). On the test day, mice were left on the mesh floor for 90 minutes for acclimatization. Post-habituation, mice were injected with U50 (5 mg/kg i.p.) or saline (0.25 ml) treatments. Post-injections, acetone (5–6  $\mu$ l) was applied to the plantar surface of the hind paw using the open end of a blunt 1-ml syringe, eliciting a rapid paw withdrawal response ((i.e., elevation, shaking, or licking). The acetone application is repeated for both the paws (three readings from each paw) and their mean was calculated. The response was recorded for one minute following each acetone application. A 10-minute break was included between each reading to prevent hypersensitivity (Colburn et al., 2007; Slivicki et al., 2018). Sensitivity to cold is recorded either by quantifying the number of times acetone dabbed paw directed behavior, or scoring the severity of the response (for example: 0, no response; 1, brisk withdrawal or flick of the paw; 2, repeated flicking of the paw; 3, repeated flicking of the hind paw and licking of the paw) or latency to lick the paw.

## Open field test (OFT)

The OFT apparatus is a 2,500 cm<sup>2</sup> arena, in which the mice were free to explore for 20 minutes. 50% of the total OFT area was defined as the center (Al-Hasani et al., 2015; McCall et al., 2015). Lighting was stabilized at ~25 lux for anxiety-like behaviors. To determine sedative and anxiety-like behavior, distance moved in the apparatus and the time spent exploring the center were quantified, respectively. On the test day, mice were left in the OFT room for 90 mins for acclimatization to the environment. Post-habituation mice were injected with saline or U50, placed in the OFT arena, and behavior was recorded for 20 minutes. Movements were video recorded and analyzed using Ethovision 13 (Noldus Information Technologies).

## Intracerebroventricular injections

Mice received intracerebroventricular (ICV) injections as previously described (Bruchas et al., 2009). Briefly, mice were anesthetized in an induction chamber (3% Isoflurane) and placed into a stereotaxic frame (Kopf Instruments, Model 942), where they were maintained at 2–2.5% isoflurane. A craniotomy was performed unilaterally into the lateral ventricle with either NorBNI (30 $\mu$ mol, 2 $\mu$ l) or artificial cerebrospinal fluid (aCSF) at 200 nl/min for 10 mins using a beveled Hamilton syringe (10  $\mu$ L-701 N with beveled tip) (stereotaxic coordinates from Bregma: A/P: +0.40 mm, M/L: +1.5 mm, D/V: –3 mm), to block central KORs (Bruchas et al., 2009; Shirayama et al., 2004). The skin was sutured after the injection using sterile nylon sutures (6.0 mm), and mice were allowed to recover for a week before any behavioral experiments. On the experimental day, post-surgery mice were systemically injected with either U50 (5 mg/kg i.p.) or saline (0.25 ml) and were exposed to the cold plate. The ICV injection placements were confirmed using immunohistochemistry.

## Immunohistochemistry

Histological verification of the injection site was performed as described (Al-Hasani et al., 2013). Mice were briefly anesthetized with 0.2ml cocktail (ketamine (100 mg/ml), xylazine

(20 mg/ml) and acepromazine (10 mg/ml)) and intracardially perfused with ice-cold 4% paraformaldehyde in phosphate buffer (PB). Brains were dissected, post-fixed 24 h at 4 °C and cryoprotected with 30% sucrose solution in 0.1 M PB at 4 °C for at least 24 h, cut into 30- $\mu$ m sections, and processed for immunostaining. The ICV injection placements were confirmed using the Paxinos-Watson atlas (Paxinos, G. and Watson, 1998) as a reference under a Leica fluorescent microscope (DM6 series scope). In total, n=76 out of 85 WT mice (male and female) had the injections landing in the lateral ventricle and the rest were excluded from the analysis.

### *In situ* Hybridization

Following rapid decapitation of C57BL6/J mice, DRG were rapidly frozen on dry ice in the mounting media, and then the tissue harvested was stored at  $-80^{\circ}\text{C}$ . DRG sections were cut at 5-7  $\mu\text{m}$  at  $-20^{\circ}\text{C}$  and thaw-mounted onto Super Frost Plus slides (Fisher, Waltham, MA). Slides were stored at  $-80^{\circ}\text{C}$  until the following day. Fluorescent *in situ* hybridization (ISH) was performed according to the RNAScope 2.0 Fluorescent Multiple Kit User Manual for Fresh Frozen Tissue (Advanced Cell Diagnostics, Inc.), as described (Wang et al., 2012). Briefly, sections were fixed in 4% PFA, dehydrated with alcohol (50%, 75%, 100%) concentrations in the respective order in accordance with the protocol. Sections were pretreated with hydrogen peroxide for 15 mins at room temperature. Following this, the sections were washed in the 1X PBS solution twice for 2 min each. Post-wash, the sections were pretreated with protease IV solution. Sections were then incubated for target probes for mouse *trpa1*(400211) (C1), *trpm8* (420451) (C2), *oprk1* (316111) (C3). Probes were obtained from Advanced Cell Diagnostics. Following probe hybridization, sections underwent a series of probe signal amplification steps followed by incubation with fluorescently labeled probes designed to target the specified channel associated with *trpa1* (fluorescein), *trpm8* (cyanin3), *oprk1* (cyanin 5). Slides were counterstained with DAPI, and coverslips were mounted with Vectashield Hard Set mounting medium (Vector Laboratories). Images were obtained on a Leica fluorescent microscope, and the expression was quantified manually using the Leica DM6 series scope by a blinded experimenter. DRGs were imaged on a Leica fluorescent microscope (DM6 series scope) at 5X, 20X, and 40X magnification. 2-3 images were acquired of each mouse DRG section, and 4-5 DRGs were imaged per mouse (n=4 for male, n=2 for females). Total cell counts for the section were assessed by counting all of the DAPI in the DRG section. In the ISH assay, each punctate dot represents a single target mRNA molecule. To avoid false positives, we set a threshold of a minimum of two puncta expressing cells only. To The target genes expression was quantified manually by counting the DAPI cells expressing the puncta. The quantified expression is averaged within a sample and across the mice and expressed as a pie chart. Each *oprk1* positive cell was assessed for colocalization with *trpm8* and *trpa1* using 40X magnification.

### Mouse DRG cultures

10-week-old male and female mice were euthanized under isoflurane by decapitation and lumbar DRG were removed (Sheahan et al., 2018; Sleigh et al., 2016). DRG culture media was prepared fresh using Neurobasal A medium (Invitrogen) with 100 U/mL penicillin/streptomycin (Corning), 2 mm GlutaMAX (Life Technologies), 2% B27 (Gibco), and 5% fetal bovine serum (Gibco). DRG were incubated in papain (40 U, Worthington)

for 20 min at 37°C, supplemented with 5% CO<sub>2</sub>. DRG were then rinsed and incubated in collagenase (Sigma-Aldrich) for 20 min, following which they were manually triturated with Pasteur pipettes to dissociate neurons, passed through a sieve of 40-µm filter, and plated onto collagen (Sigma-Aldrich)-coated 12-mm glass coverslips (Thermo Fisher Scientific). Neurons were maintained in culture media for two days prior to calcium imaging experiments.

### Calcium Imaging

To determine calcium dynamics, cultured DRG neurons from C57BL/6J male and female, TRPA1<sup>-/-</sup> male mice were loaded with Fura-2 (3 µg/mL, Life Technologies) and pluronic acid (1:1) for 45-60 min to enable visualization of changes in calcium concentrations (Munanairi et al., 2018; Snyder et al., 2018). Neurons were then incubated in Tyrode's solution for 15-20 min to allow for de-esterification of Fura-2 AM. Tyrode's solution consisted of (in mM): 130 NaCl, 5 KCl, 2 CaCl<sub>2</sub>, 1 MgCl<sub>2</sub>, 30 glucose, and 10 Hepes and was made fresh on the experimental day. On the day of recording, coverslips were placed into a temperature-controlled chamber (37°C) with Tyrode's solution. The cultures were treated with either KOR agonist (U50488, 10 µM) alone, TRPA1 agonist (Mustard oil (MO) 100µM), or a combination of both. The change in the intensity of the Ca<sup>2+</sup> indicator is quantified to estimate the change in the concentration of free Ca<sup>2+</sup> using calcium imaging software suite (Leica Systems) to record fluorescence emission at alternating excitation wavelengths of 357 and 380 nm. A KCl response at the end of an experiment served as a positive control for cell health and activity. For detailed timelines, refer to calcium imaging figure sets.

### Statistical Analysis

All data samples were tested for homogeneity of variance and normality before being assigned to any parametric analysis. All experiments were performed in multiple cohorts, including all treatment groups in each round, to avoid any unspecific day/condition effect. Treatments were randomly assigned to animals before testing. G\*Power was used to estimate effect sizes and to compute power analyses. Statistical significance was considered \**p* < 0.05, \*\**p* < 0.01, \*\*\**p* < 0.001, and \*\*\*\**p* < 0.0001, as determined by parametric or nonparametric analysis. Parametric data was analyzed using two-way ANOVA repeated measures for tail withdrawal assay analysis, two-way ANOVA for mechanical sensitivity analysis. For ordinal ranking such as scoring the number of jumps (nonparametric data), Kruskal-Wallis followed by the Dunn's multiple comparison test for analyzing the cold plate assay data. For the temperature curve data, nonparametric (two-way ANOVA) mixed-effects analysis was followed by Sidak's *post-hoc* test for the cold plate assay analysis. Mann Whitney U test for cold plate data using peripheral novel agonist. Statistical analyses were performed in GraphPad Prism 8.0. All data are expressed as mean ± SEM.

## Results

### KOR activation induces cold hypersensitivity



To determine whether KOR activation mediates temperature-dependent hypersensitivity, we recorded jumping behavior across a range of temperatures (3°C, 10°C, 15°C, 20°C, 30°C, 42°C) (**Fig 1A**). Jumping behavior in this assay has been well-established as a measure of nocifensive behavior (Allchorne et al., 2005; Castellanos et al., 2020; Deuis et al., 2017). We show that the KOR agonist, U50 (5 mg/kg i.p.) significantly increases the number of jumps when compared to controls at 3°C in males and females (**Fig 1B&C**). This jumping behavior is supported by a significant decrease in latency to jump in male and females at 3°C (**Fig 1D&E**). Together, these results show that KOR activation selectively induces hypersensitivity to noxious cold. An increase in the number of jumps is also observed at 42°C, but this effect also occurs in the saline-treated groups, and the U50-treated male mice suggesting that this is not due to activation of KOR, but rather the noxious hot temperature itself (Yalcin et al., 2009) (**Fig 1C**).

We demonstrate that U50 does not alter core body temperature (**Fig 1F,G&H**) or paw surface temperature (**Fig 1&J**), as compared to saline controls, using rectal probe and paw surface temperature using thermal imaging. This suggests that KOR-mediated cold hypersensitivity effects are not due to altered thermoregulation. We also corroborate published findings showing that U50 (5 mg/kg i.p.) is antinociceptive in both the warm water tail-withdrawal assay (**Fig 1K,L&M**) and the von Frey test of mechanical sensitivity (**Fig 1O&P**). To further substantiate that KOR-induced noxious cold hypersensitivity is temperature-dependent, we used the acetone evaporation test. Acetone is known to mimic cool temperatures in the range of 15–21°C, but not noxious cold temperatures (Colburn et al., 2007; Leith et al., 2010). In this test, we show that U50-mediated KOR activation does not alter paw withdrawal behavior (**Fig S1B**), or duration of nocifensive responses (**Fig S1C**). Importantly, we show that the dose of U50 used in this study (5 mg/kg i.p.) does not have sedative effects (common at higher doses), as demonstrated by no differences in locomotor activity between the groups (**Fig S1F&G**).

#### Potentiation of cold hypersensitivity is KOR selective

To determine the necessity of KORs in cold hypersensitivity to 3°C, we pharmacologically blocked KORs using norBNI (KOR antagonist, 10 mg/kg, i.p.), which reversed U50-induced cold hypersensitivity on the cold plate (**Fig 2B&C**), in both male and female mice. Systemic norBNI (i.p.) administration alone did not alter any nocifensive response in either sex (**Fig 2E&F**). Additionally, we show that activation of mu opioid receptors with morphine (10 mg/kg s.c.), does not drive cold hypersensitivity in male and female mice (**Fig 2E&F**), suggesting that this is a KOR-selective effect. Together, these data demonstrate that KOR exclusively potentiates cold hypersensitivity at noxious cold temperatures (3°C).

#### Peripheral KORs mediate cold hypersensitivity

To determine whether KORs in the central or peripheral nervous system mediate the observed increase in cold hypersensitivity, we first blocked central KOR by intracerebroventricularly (ICV) injecting norBNI and systemically (i.p.) administering U50 prior to placing them on the cold plate (**Fig 2G**). Central administration of norBNI (norBNI(ICV) + U50(i.p.)) did not attenuate or block the observed U50-induced cold hypersensitivity, as compared to controls (aCSF(ICV) + U50 (i.p.)) (**Fig 2H&I**). Similarly to systemic administration, central norBNI administration alone did not alter cold

sensitivity, as compared to the controls (aCSF (ICV)+saline (i.p.)). Mice infused with aCSF(ICV) and U50 (i.p.) showed increased cold sensitivity, as compared to the control group (aCSF (ICV)+saline (i.p.)) (**Fig 2H&I**). The effects were similar in male and female mice (**Fig 2H&I**). Together these data show that central KORs do not seem to mediate cold hypersensitivity. To directly address this we used a peripherally restricted KOR agonist ff(nle)r-NH<sub>2</sub> (10 mg/kg i.p.) (Alleyne et al, in revision) which significantly increased jumping on the cold plate at 3°C in both males and females (**Fig 2K&L**). Together, these data strongly suggest that peripheral KOR activation induces cold hypersensitivity.

### *oprk1* transcripts colocalize with *trpa1* and *trpm8* transcripts in DRG

To further investigate how peripheral KOR mediate cold hypersensitivity we looked to TRP channels that are known to be necessary for thermosensation. Specifically, the TRPA1 and TRPM8 channels have been most widely associated with cold sensitivity (MacDonald et al., 2020b; McKemy et al., 2002b; Patapoutian et al., 2009). To determine whether KORs are expressed on the same dorsal root ganglia (DRG) cells as TRPA1 and/or TRPM8, we performed *in situ* hybridization against the mRNA for KOR (*oprk1*), TRPA1 (*trpa1*), and TRPM8 (*trpm8*) in males (**Fig 3A-F**) and females (**Fig 3G-L**). We found that in male DRGs, 6.01% of all cells expressed *oprk1* (**Fig 3M**), 17% expressed *trpa1* (**Fig 3N**), and 5.2% of the cells expressed *trpm8* (**Fig 3P**). 2% of the cells expressing *oprk1* colocalized with *trpa1* positive cells (**Fig 3P**), 2.7 % with *trpm8* (**Fig 3Q**) and 0.1 % with both the *trpa1* and *trpm8* (**Fig 3R**). The coexpression of *oprk1* with *trpm8* transcripts is higher in male DRGs when compared to female DRGs (**Fig 3Q**). In female DRGs, 6.8% of all cells expressed *oprk1* (**Fig 3M**), 20% expressed *trpa1* (**Fig 3N**), and 5.25% expressed *trpm8* (**Fig 3O**). 2.8% of the cells expressing *oprk1* colocalized with *trpa1* positive cells (**Fig 3P**), 0.747% with *trpm8* (**Fig 3Q**) and 0.3% with both the *trpa1* and *trpm8* (**Fig 3S**). These data show that 60% of *oprk1* expressing cells in the DRG also express either *trpa1* or *trpm8* or both. This expression level is similar between males and females except for *trpm8+oprk1* colocalization.

### KOR potentiates Ca<sup>2+</sup> mobilization via TRPA1

To understand how peripheral KOR might induce cold hypersensitivity, we measured calcium responses in cultured DRG following simultaneous application of mustard oil (MO; TRPA1 agonist) and U50 (**Fig 4A-D**) in male WT mice. U50 together with MO, significantly increased DRG Ca<sup>2+</sup> mobilization when compared to MO alone (**Fig 4D**). Application of U50 alone did not mobilize Ca<sup>2+</sup> when compared to MO or MO+U50 treatments in WT male mice (**Fig 4D**). Furthermore, in TRPA1 knockout mice (TRPA1<sup>-/-</sup>), neither MO application alone or together with U50 altered Ca<sup>2+</sup> signaling (**Fig 4E-G**). Together our data suggest that KOR induces cold hypersensitivity through enhancing activity at TRPA1 channels.

### Discussion

Here we report that peripheral KOR activation increases cold sensitivity in mice. We show that transcripts for KORs are present in the same cells as TRPA1 and TRPM8 in DRG.

Furthermore, activation of KOR and TRPA1 together in cultured DRG neurons potentiates calcium mobilization compared to activation of TRPA1 alone. This suggests that KORs are likely able to modulate cold hypersensitivity through modification of TRPA1 in DRG.

KORs have long been considered promising targets for pain and itch relief due to their non-addictive profile (Porreca and Burks, 1983; Porreca et al., 1984; Shippenberg et al., 1988). However, the most significant limitation to targeting the KOR system has been the resultant negative affect, primarily mediated by the central activation of KOR (Horan and Porreca, 1993; Porreca et al., 1987), particularly in the nucleus accumbens (Al-Hasani et al., 2015; Massaly et al., 2019; Shippenberg et al., 1988). Recent evidence suggests that centrally- and peripherally-expressed KOR modulate different behaviors. For example, our group and others have shown that central KOR activation and upregulation modulates negative affect associated with peripheral nerve injury and inflammatory pain models (S. S. Liu et al., 2019; Massaly et al., 2019). Conversely, recent studies suggest peripherally-restricted KOR agonists selectively inhibit chemical pain and mechanical hypersensitivity associated with capsaicin-induced neurogenic inflammatory pain model and a surgical incision model, respectively (Snyder et al., 2018). Together these findings highlight the complex role of the KOR system in different pain and sensation modalities. As a result, this has prompted the investigation into the therapeutic potential of peripherally-expressed KORs (Beck et al., 2019; Snyder et al., 2018; Togashi et al., 2002). Progress has been constrained by the lack of peripherally restricted KOR compounds, as well as short-acting antagonists. However, more recently, there has been a focused effort to develop both short-acting reversible antagonists (Page et al., 2019) and peripherally restricted agonists (Barber et al., 1994; Beck et al., 2019; Olesen et al., 2013; Paton et al., 2020; Shaw et al., 1989; Suzuki et al., 2017; Alleyne et al, in revision) to understand the role of KOR in pain- and itch-related behaviors.

Peripherally restricted KOR agonism has shown promise in the treatment of itch. Asimadoline (peripherally-restricted KOR agonist) has demonstrated efficacy in animal models of pruritus (Barber et al., 1994). The drug candidate is now in Phase 2 Proof-of-Concept clinical study to treat pruritus associated with atopic dermatitis by Tioga Pharmaceuticals (ClinicalTrials.gov, NCT01513161). TRK-820 (nalfurafine) manufactured by Toray Industries, Inc. is approved and used in Japan to treat uremic pruritus (Kumagai et al., 2010). JT09, a peripherally-restricted KOR agonist, has been shown to be as effective as morphine in alleviating pain without any sedative effects (Beck et al., 2019). CR845 is currently in phase II/III development to treat acute post-operative uremic pruritus and acute postoperative pain (ClinicalTrials.gov, NCT03998163) (Keppel Hesselink, 2017). The peptide is well-tolerated and is proven to be as effective as oxycodone in a human model of acute visceral pain (Arendt-Nielsen et al., 2009), without reports of dysphoria or hallucinations (Keppel Hesselink, 2017). In our current studies, we use an analogue of this compound, ff(nle)r-NH<sub>2</sub> (Alleyne et al, in revision), to show that activation of peripheral KORs increase cold sensitivity in male and female mice, identifying an important role for the peripheral KOR system in cold hypersensitivity.

Though little is known about the KOR system in cold sensation, it has been widely shown that the role of KOR in pain is dependent on the type of pain and sex. For example, in chronic pain states, KOR has been shown to induce negative affect (Liu et al., 2019; Massaly et al., 2019) that is absent following acute pain (Bagdas et al., 2016; Leidl et al.,

2014b, 2014a). In both preclinical animal models and human imaging studies, KOR modulation of pain has been shown to be sex-dependent. In preclinical studies, intraplantar administration of U50 (100 µg/20µl) in males potentiated anti-hyperalgesic activity, as compared to females, suggesting a sex-dependent effect in the lateral sensitization rat model (Auh and Ro, 2012; Custodio-Patsey et al., 2020). Similarly administration of U50 increased tail withdrawal latency in male mice compared to female mice in tail withdrawal assay at 49°C (Taylor et al., 2015). In addition, negative affect observed in peripheral nerve injury (PNI), neuropathic pain model is potentiated in male mice alone following activation of KOR's by U50, (Liu et al., 2019). Furthermore, the KOR-potentiated negative affect was blocked by JDTC (KOR antagonist) in male PNI mice, but not female PNI mice (Liu et al., 2019). Similarly negative affect associated in chronic inflammatory pain model was mitigated by JDTC in male mice (Liu et al., 2019). These preclinical findings show that the differential effects of sex not only directly impact pain processing, but also the negative affective state associated with the chronic pain. Clinically, positron emission tomography studies show that KOR receptor binding is higher in men than in women, especially in the anterior cingulate cortex, a region associated with pain affect (Vijay et al., 2018).

To fully evaluate sex as a biological variable, we investigated the KOR-modulation of cold hypersensitivity in both males and females. In this context, we report no significant differences except for the higher co-expression of *oprk1* and *trpm8* transcripts in males compared to females in DRGs. Whether this differential expression between males and females has functional consequences is not yet known, but the sensitivity to noxious cold temperature upon activation of KOR appears to be minimal between male and female mice.

We also considered KORs somewhat controversial role in thermoregulation (Rawls and Benamar, 2011). Higher doses of U50 than we use here (20 mg/kg; 40 mg/kg) have been shown to cause hypothermia in mice (Nemmani et al., 2001), and this response to KOR activation is markedly influenced by tolerance developed by receptors upon repeated administration of KOR agonists (Milanés et al., 1991; Rawls et al., 2008; Von Voigtlander and Lewis, 1982). In contradiction, another study revealed that the 30 mg/kg dose of U50 did not affect rectal body temperature in mice (Itoh et al., 1993). Here we show that neither KOR agonists (U50 or ff(nle)r-NH<sub>2</sub>) alter body temperature in male and female mice.

To understand how activation of KOR mediates cold hypersensitivity, we investigated TRPA1 and TRPM8 channels, both well known for their role in cold sensitivity (MacDonald et al., 2020b; McKemy et al., 2002b; Palkar et al., 2015; Patapoutian et al., 2009). Interestingly, there has been targeted research exploring MOR, but not KOR, and TRP channel interactions (Shapovalov et al., 2013; Williams et al., 2013). In mice, spinal TRPA1 is shown to facilitate morphine-induced antinociception on a hot plate (Wei et al., 2016), suggesting a functional interaction between MOR and TRP channels in modulating thermal sensitivities. Furthermore, administration of opioids has been shown to distort thermal sensation. For example, some patients experience waves of warmth upon opioid administration (Chu et al., 2006), and drug withdrawal is often characterized by cold chills in combination with hyperalgesia (Pud et al., 2006). Similar information about KOR and TRP channels interactions are absent despite the fact that KOR is known to be involved in neuropathic pain (S. Liu et al., 2016; Navratilova et al., 2019; Xu et al., 2004).

Co-localization and electrophysiological studies have confirmed the presence of KORs on C- and A-fibers on DRG neurons (Ji et al., 1995; Zhang et al., 1998) expressing the TRP channel, TRPV1, and calcitonin gene-related peptide (Snyder et al., 2018). Studies have shown that TRPM3 (Mucopilin 3), another TRP channel known to detect temperature and pain, interacts with the  $\beta\gamma$  subunits of the G-protein in the DRG to regulate calcium currents, implying the role of GPCR's in calcium signaling (Badheka et al., 2015; Quallo et al., 2017). Calcium imaging studies in human DRG neurons show a decrease in  $Ca^{2+}$  influx in the presence of the endogenous KOR ligand, dynorphin (Snyder et al., 2018). However, the calcium activity of KOR has not been evaluated in conjunction with TRP channels. We show that activation of KOR and TRPA1 together, in DRG, potentiates calcium release, as compared to activation of TRPA1 alone. This suggests that cold hypersensitivity may be driven by peripheral activation of KOR that subsequently enhances the function of TRPA1, perhaps through receptor operation. Bautista et al. have shown similar mechanisms where  $Ca^{2+}$  released in response to inflammatory mediators act as a co-factor in activating TRPA1. Further exploration of the downstream signaling pathway mediating the calcium homeostasis via the KOR is warranted.

Cold hypersensitivity is a chronic, debilitating, and poorly treated symptom prevalent in many neuropathic pain conditions such as multiple sclerosis, fibromyalgia, complex regional pain syndrome, and neuropathy following chemotherapy treatment. Our results identify a potential role for the KOR system in the mediation of cold hypersensitivity. Here we show KOR's role to be restricted to peripheral activation, which is translationally encouraging as it allows the study of this system without centrally-mediated aversive side effects.

#### Acknowledgments

We thank all the members of the Al-Hasani and McCall laboratories for helpful insight and discussion, especially to Gray B. Gereau, Marie C. Walicki, Gavin P. Schmitz and Kia M. Barclay for proficiently managing our lab's mouse colony. We are thankful for technical assistance from the Gereau lab (WUSTL), Dr. Hongzhen Hu, (WUSTL), Dr. Steve Davidson (University of Cincinnati) and Dr. D.P. Mohapatra. Special thanks to Dr. Michael R. Bruchas and Dr. Gina M. Story for early support and pursuit of this line of work. We would also like to thank our administrative manager at the Center for Clinical Pharmacology, Jodi Maslin, for her support.

#### Funding

NIH-R00DA038725 National Institute on Drug Abuse (R.A), NIH-R01NS117899 (J.G.M.), and the Rita Allen Foundation with help from the Open Philanthropy Projection (J.G.M.)

#### DECLARATION OF INTERESTS

The authors declare no competing interests.

Author contributions:

Conceptualization, M.K.M, T.S.S., A.M.F., and R.A.; Methodology, M.K.M., L.V.T, J.G.M., and R.A.; Investigation, M.K.M., L.V.T, P.C., S.P., J.S.A., R.A.H., and R.A. Manuscript preparation, M.K.M., J.G.M., and R.A.; Funding acquisition, R.A.; Supervision, J.P.M., J.G.M., and R.A.; Project administration, R.A.

## References:

Al-Hasani, R., McCall, J.G., Foshage, A.M., and Bruchas, M.R. (2013). Locus coeruleus kappa-opioid receptors modulate reinstatement of cocaine place preference through a noradrenergic mechanism. *Neuropsychopharmacology* 38, 2484–2497.

Al-Hasani, R., McCall, J.G., Shin, G., Gomez, A.M., Schmitz, G.P., Bernardi, J.M., Pyo, C.-O., Park, S.I., Marcinkiewicz, C.M., Crowley, N.A., et al. (2015). Distinct Subpopulations of Nucleus Accumbens Dynorphin Neurons Drive Aversion and Reward. *Neuron* 87, 1063–1077.

Allchorne, A.J., Broom, D.C., and Woolf, C.J. (2005). Detection of cold pain, cold allodynia and cold hyperalgesia in freely behaving rats. *Mol. Pain* 1.

Arendt-Nielsen, L., Olesen, A.E., Staahl, C., Menzaghi, F., Kell, S., Wong, G.Y., and Drewes, A.M. (2009). Analgesic Efficacy of Peripheral  $\kappa$ -Opioid Receptor Agonist CR665 Compared to Oxycodone in a Multi-modal, Multi-tissue Experimental Human Pain Model. *Anesthesiology* 111, 616–624.

Attal, N., Bouhassira, D., Gautron, M., Vaillant, J.N., Mitry, E., Lepère, C., Rougier, P., and Guirimand, F. (2009). Thermal hyperalgesia as a marker of oxaliplatin neurotoxicity: A prospective quantified sensory assessment study. *Pain* 144, 245–252.

Auh, Q.-S., and Ro, J.Y. (2012). Effects of peripheral  $\kappa$  opioid receptor activation on inflammatory mechanical hyperalgesia in male and female rats. *Neurosci. Lett.* 524, 111–115.

Badheka, D., Borbiri, I., and Rohacs, T. (2015). Transient receptor potential melastatin 3 is a phosphoinositide-dependent ion channel. *J. Gen. Physiol.* 146, 65–77.

Bagdas, D., Muldoon, P.P., Alsharari, S., Carroll, F.I., Negus, S.S., and Damaj, M.I. (2016). Expression and pharmacological modulation of visceral pain-induced conditioned place aversion in mice. *Neuropharmacology* 102, 236–243.

Barber, A., Bartoszyk, G.D., Greiner, H.E., Mauler, F., Murray, R.D., Seyfried, C.A., Simon, M., Gottschlich, R., Harting, J., and Lues, I. (1994). Central and peripheral actions of the novel  $\kappa$ -opioid receptor agonist, EMD 60400. *Br. J. Pharmacol.* 111, 843–851.

Bautista, D.M., Jordt, S.E., Nikai, T., Tsuruda, P.R., Read, A.J., Poblete, J., Yamoah, E.N., Basbaum, A.I., and Julius, D. (2006). TRPA1 Mediates the Inflammatory Actions of Environmental Irritants and Proalgesic Agents. *Cell* 124, 1269–1282.

Beck, T.C., Reichel, C.M., Helke, K.L., Bhadsavle, S.S., and Dix, T.A. (2019). Non-addictive orally-active kappa opioid agonists for the treatment of peripheral pain in rats.

Eur. J. Pharmacol. 856.

Bruchas, M.R., Land, B.B., Lemos, J.C., and Chavkin, C. (2009). CRF1-R activation of the dynorphin/kappa opioid system in the mouse basolateral amygdala mediates anxiety-like behavior. *PLoS One* 4, 8528.

Castellanos, A., Pujol-Coma, A., Andres-Bilbe, A., Negm, A., Callejo, G., Soto, D., Noël, J., Comes, N., and Gasull, X. (2020). TRESK background K<sup>+</sup> channel deletion selectively uncovers enhanced mechanical and cold sensitivity. *J. Physiol.* 598, 1017–1038.

Chartoff, E.H., and Mavrikaki, M. (2015). Sex differences in kappa opioid receptor function and their potential impact on addiction. *Front. Neurosci.* 9, 466.

Christogianni, A., Bibb, R., Davis, S.L., Jay, O., Barnett, M., Evangelou, N., and Filingeri, D. (2018). Temperature sensitivity in multiple sclerosis: An overview of its impact on sensory and cognitive symptoms. *Temperature* 5, 208–223.

Chu, L.F., Clark, D.J., and Angst, M.S. (2006). Opioid tolerance and hyperalgesia in chronic pain patients after one month of oral morphine therapy: A preliminary prospective study. *J. Pain* 7, 43–48.

Clapham, D.E. (2003). TRP channels as cellular sensors. *Nature* 426, 517–524.

Clemente, J.T., Parada, C.A., Veiga, M.C.A., Gear, R.W., and Tambeli, C.H. (2004). Sexual dimorphism in the antinociception mediated by kappa opioid receptors in the rat temporomandibular joint. *Neurosci. Lett.* 372, 250–255.

Colburn, R.W., Lubin, M. Lou, Stone, D.J., Wang, Y., Lawrence, D., D'Andrea, M.R.R., Brandt, M.R., Liu, Y., Flores, C.M., and Qin, N. (2007). Attenuated Cold Sensitivity in TRPM8 Null Mice. *Neuron* 54, 379–386.

Custodio-Patsey, L., Donahue, R.R., Fu, W., Lambert, J., Smith, B.N., and Taylor, B.K. (2020). Sex differences in kappa opioid receptor inhibition of latent postoperative pain sensitization in dorsal horn. *Neuropharmacology* 163, 107726.

Deuis, J.R., Dvorakova, L.S., and Vetter, I. (2017). Methods Used to Evaluate Pain Behaviors in Rodents. *Front. Mol. Neurosci.* 10, 284.

Dhaka, A., Earley, T.J., Watson, J., and Patapoutian, A. (2008). Visualizing cold spots: TRPM8-expressing sensory neurons and their projections. *J. Neurosci.* 28, 566–575.

Gioiosa, L., Chen, X., Watkins, R., Umeda, E.A., and Arnold, A.P. (2008). Sex Chromosome Complement Affects Nociception and Analgesia in Newborn Mice. *J. Pain* 9, 962–969.

Holtman, J.R., and Wala, E.P. (2006). Characterization of the antinociceptive effect of oxycodone in male and female rats. *Pharmacol. Biochem. Behav.* 83, 100–108.

Horan, P.J., and Porreca, F. (1993). Lack of cross-tolerance between U69,593 and bremazocine suggest  $\kappa$ -opioid receptor multiplicity in mice. *Eur. J. Pharmacol.* 239, 93–98.

Itoh, J., Ukai, M., and Kameyama, T. (1993). U-50,488H, a  $\kappa$ -opioid receptor agonist, markedly prevents memory dysfunctions induced by transient cerebral ischemia in mice. *Brain Res.* *619*, 223–228.

Jensen, T.S., and Finnerup, N.B. (2014). Allodynia and hyperalgesia in neuropathic pain: clinical manifestations and mechanisms. *Lancet Neurol.* *13*, 924–935.

Ji, R.R., Zhang, Q., Law, P.Y., Low, H.H., Elde, R., and Hökfelt, T. (1995). Expression of  $\mu$ -,  $\delta$ -, and  $\kappa$ -opioid receptor-like immunoreactivities in rat dorsal root ganglia after carrageenan-induced inflammation. *J. Neurosci.* *15*, 8156–8166.

Kay, S. (1985). Venous occlusion plethysmography in patients with cold related symptoms after digital salvage procedures. *J. Hand Surg. Br.* *10*, 151–154.

Keppel Hesselink, J.M. (2017). Pharmacology & Clinical Research CR845 (Difelikefalin), A Kappa Receptors Agonist In Phase III By CARA Therapeutics: A Case Of “Spin” In Scientific Writing?

Kudel, I., Hopps, M., Cappelleri, J.C., Sadosky, A., King-Concialdi, K., Liebert, R., Parsons, B., Hlavacek, P., Alexander, A.H., DiBonaventura, M.D., et al. (2019). Characteristics of patients with neuropathic pain syndromes screened by the painDETECT questionnaire and diagnosed by physician exam. *J. Pain Res.* *12*, 255–268.

Kumagai, H., Ebata, T., Takamori, K., Muramatsu, T., Nakamoto, H., and Suzuki, H. (2010). Effect of a novel kappa-receptor agonist, nalfurafine hydrochloride, on severe itch in 337 haemodialysis patients: A Phase III, randomized, double-blind, placebo-controlled study. *Nephrol. Dial. Transplant.* *25*, 1251–1257.

Leith, J.L., Koutsikou, S., Lumb, B.M., and Apps, R. (2010). Spinal processing of noxious and innocuous cold information: Differential modulation by the periaqueductal gray. *J. Neurosci.* *30*, 4933–4942.

Leitl, M.D., Potter, D.N., Cheng, K., Rice, K.C., Carlezon, W.A., and Negus, S.S. (2014a). Sustained pain-related depression of behavior: Effects of intraplantar formalin and complete Freund’s adjuvant on intracranial self-stimulation (ICSS) and endogenous kappa opioid biomarkers in rats. *Mol. Pain* *10*, 1–11.

Leitl, M.D., Onvani, S., Bowers, M.S., Cheng, K., Rice, K.C., Carlezon, W.A., Banks, M.L., and Negus, S.S. (2014b). Pain-related depression of the mesolimbic dopamine system in rats: Expression, blockade by analgesics, and role of endogenous  $\kappa$ -opioids. *Neuropsychopharmacology* *39*, 614–624.

Liu, S.S., Pickens, S., Burma, N.E., Ibarra-Lecue, I., Yang, H., Xue, L., Cook, C., Hakimian, J.K., Severino, A.L., Lueptow, L., et al. (2019). Kappa opioid receptors drive a tonic aversive component of chronic pain. *J. Neurosci.* *39*, 4162–4178.

Lolignier, S., Bonnet, C., Gaudio, C., Noël, J., Ruel, J., Amsalem, M., Ferrier, J., Rodat-Despoix, L., Bouvier, V., Aissouni, Y., et al. (2015). The Nav1.9 Channel Is a Key Determinant of Cold Pain Sensation and Cold Allodynia. *Cell Rep.* *11*, 1067–1078.

MacDonald, D.I., Luiz, A., Millet, Q., Emery, E., and Wood, J. (2020a). Silent cold-



sensing neurons drive cold allodynia in neuropathic pain states. *BioRxiv* 2020.05.02.073999.

MacDonald, D.I., Wood, J.N., and Emery, E.C. (2020b). Molecular mechanisms of cold pain. *Neurobiol. Pain* 7, 100044.

Massaly, N., Copits, B.A., Wilson-Poe, A.R., Hipólito, L., Markovic, T., Yoon, H.J., Liu, S., Walicki, M.C., Bhatti, D.L., Sirohi, S., et al. (2019). Pain-Induced Negative Affect Is Mediated via Recruitment of The Nucleus Accumbens Kappa Opioid System. *Neuron* 0.

McCall, J.G., Al-Hasani, R., Siuda, E.R., Hong, D.Y., Norris, A.J., Ford, C.P., and Bruchas, M.R. (2015). CRH Engagement of the Locus Coeruleus Noradrenergic System Mediates Stress-Induced Anxiety. *Neuron* 87, 605–620.

McKemy, D.D., Neuhausser, W.M., and Julius, D. (2002a). Identification of a cold receptor reveals a general role for TRP channels in thermosensation. *Nature* 416, 52–58.

McKemy, D.D., Neuhausser, W.M., and Julius, D. (2002b). Identification of a cold receptor reveals a general role for TRP channels in thermosensation. *Nature* 416, 52–58.

Milanés, M.V., Gonzalez, M.L., Fuente, T., and Vargas, M.L. (1991). Pituitary-adrenocortical response to acute and chronic administration of U-50 488H in the rat. *Neuropeptides* 20, 95–102.

Munanairi, A., Liu, X.-Y., Barry, D.M., Yang, Q., Yin, J.-B., Jin, H., Li, H., Meng, Q.-T., Peng, J.-H., Wu, Z.-Y., et al. (2018). Non-canonical Opioid Signaling Inhibits Itch Transmission in the Spinal Cord of Mice. *Cell Rep.* 23, 866–877.

Nemmani, K.V., Gullapalli, S., and Ramarao, P. (2001). Potentiation of  $\kappa$ -opioid receptor agonist-induced analgesia and hypothermia by fluoxetine. *Pharmacol. Biochem. Behav.* 69, 189–193.

Olesen, A.E., Kristensen, K., Staahl, C., Kell, S., Wong, G.Y., Arendt-Nielsen, L., and Drewes, A.M. (2013). A population pharmacokinetic and pharmacodynamic study of a peripheral  $\kappa$ -opioid receptor agonist CR665 and oxycodone. *Clin. Pharmacokinet.* 52, 125–137.

Page, S., Mavrikaki, M.M., Lintz, T., Puttick, D., Roberts, E., Rosen, H., Carroll, F.I., Carlezon, W.A., and Chartoff, E.H. (2019). Behavioral Pharmacology of Novel Kappa Opioid Receptor Antagonists in Rats. *Int. J. Neuropsychopharmacol.* 22, 735–745.

Palkar, R., Lippoldt, E.K., and McKemy, D.D. (2015). The molecular and cellular basis of thermosensation in mammals. *Curr. Opin. Neurobiol.* 34, 14–19.

Patapoutian, A., Tate, S., and Woolf, C.J. (2009). Transient receptor potential channels: targeting pain at the source. *Nat. Rev. Drug Discov.* 8, 55–68.

Paton, K., Atigari, D., Kaska, S., Prisinzano, T.E., and Kivell, B.M. (2020). Strategies for developing kappa opioid receptor agonists for the treatment of pain with fewer side-effects. *J. Pharmacol. Exp. Ther.* JPET-MR-2020-000134.

Paxinos, G. and Watson, C. (1998). *The rat brain in stereotaxic coordinates* (London,UK: Academic Press).

Pogorzala, L.A., Mishra, S.K., and Hoon, M.A. (2013). The cellular code for mammalian thermosensation. *J. Neurosci.* 33, 5533–5541.

Porreca, F., and Burks, T.F. (1983). The spinal cord as a site of opioid effects on gastrointestinal transit in the mouse. *J. Pharmacol. Exp. Ther.* 227.

Porreca, F., Mosberg, H.I., Hurst, R., Hruby, V.J., and Burks, T.F. (1984). Roles of mu, delta and kappa opioid receptors in spinal and supraspinal mediation of gastrointestinal transit effects and hot-plate analgesia in the mouse. *J. Pharmacol. Exp. Ther.* 230.

Porreca, F., Mosberg, H.I., Omnaas, J.R., Burks, T.F., and Cowan, A. (1987). Supraspinal and spinal potency of selective opioid agonists in the mouse writhing test. *J. Pharmacol. Exp. Ther.* 240, 890 LP – 894.

Pud, D., Cohen, D., Lawental, E., and Eisenberg, E. (2006). Opioids and abnormal pain perception: New evidence from a study of chronic opioid addicts and healthy subjects. *Drug Alcohol Depend.* 82, 218–223.

Puehler, W., Rittner, H.L., Mousa, S.A., Brack, A., Krause, H., Stein, C., and Schäfer, M. (2006). Interleukin-1 beta contributes to the upregulation of kappa opioid receptor mRNA in dorsal root ganglia in response to peripheral inflammation. *Neuroscience* 141, 989–998.

Quallo, T., Alkhatib, O., Gentry, C., Andersson, D.A., and Bevan, S. (2017). G protein  $\beta$  subunits inhibit TRPM3 ion channels in sensory neurons. *Elife* 6.

Rawls, S.M., and Benamar, K. (2011). Effects of opioids, cannabinoids, and vanilloids on body temperature. *Front. Biosci. (Schol. Ed.)* 3, 822–845.

Rawls, S.M., Robinson, W., Patel, S., and Baron, A. (2008). Beta-lactam antibiotic prevents tolerance to the hypothermic effect of a kappa opioid receptor agonist. *Neuropharmacology* 55, 865–870.

Reker, A.N., Chen, S., Etter, K., Burger, T., Caudill, M., and Davidson, S. (2020). The operant plantar thermal assay: A novel device for assessing thermal pain tolerance in mice. *ENeuro* 7.

Shapovalov, G., Gkika, D., Devilliers, M., Kondratskyi, A., Gordienko, D., Busserolles, J., Bokhobza, A., Eschalier, A., Skryma, R., and Prevarskaya, N. (2013). Opiates modulate thermosensation by internalizing cold receptor TRPM8. *Cell Rep.* 4, 504–515.

Shaw, J.S., Carroll, J.A., Alcock, P., and Main, B.G. (1989). ICI 204448: A  $\kappa$ -opioid agonist with limited access to the CNS. *Br. J. Pharmacol.* 96, 986–992.

Sheahan, T.D., Valtcheva, M. V., McIlvried, L.A., Pullen, M.Y., Baranger, D.A.A., and Gereau, R.W. (2018). Metabotropic glutamate receptor 2/3 (mGluR2/3) activation suppresses TRPV1 sensitization in mouse, but not human, sensory neurons. *ENeuro* 5, 412–429.

Shippenberg, T.S., Stein, C., Huber, A., Millan, M.J., and Herz, A. (1988). Motivational effects of opioids in an animal model of prolonged inflammatory pain: alteration in the effects of  $\kappa$ -but not of  $\mu$ -receptor agonists. *Pain* 35, 179–186.

Shirayama, Y., Ishida, H., Iwata, M., Hazama, G.I., Kawahara, R., and Duman, R.S. (2004). Stress increases dynorphin immunoreactivity in limbic brain regions and dynorphin antagonism produces antidepressant-like effects. *J. Neurochem.* 90, 1258–1268.

Sleigh, J.N., Weir, G.A., and Schiavo, G. (2016). A simple, step-by-step dissection protocol for the rapid isolation of mouse dorsal root ganglia. *BMC Res. Notes* 9.

Slivicki, R.A., Saberi, S.A., Iyer, V., Vemuri, V.K., Makriyannis, A., and Hohmann, A.G. (2018). Brain-permeant and -impermeant inhibitors of fatty acid amide hydrolase synergize with the opioid analgesic morphine to suppress chemotherapy-induced neuropathic nociception without enhancing effects of morphine on gastrointestinal transit. *J. Pharmacol. Exp. Ther.* 367, 551–563.

Snyder, L.M., Chiang, M.C., Loeza-Alcocer, E., Omori, Y., Hachisuka, J., Sheahan, T.D., Gale, J.R., Adelman, P.C., Sypek, E.I., Fulton, S.A., et al. (2018). Kappa Opioid Receptor Distribution and Function in Primary Afferents. *Neuron* 99, 1274-1288.e6.

Story, G.M., Peier, A.M., Reeve, A.J., Eid, S.R., Mosbacher, J., Hricik, T.R., Earley, T.J., Hergarden, A.C., Andersson, D.A., Hwang, S.W., et al. (2003). ANKTM1, a TRP-like channel expressed in nociceptive neurons, is activated by cold temperatures. *Cell* 112, 819–829.

Suzuki, S., Sugawara, Y., Inada, H., Tsuji, R., Inoue, A., Tanimura, R., Shimozone, R., Konno, M., Ohyama, T., Higashi, E., et al. (2017). Discovery of peripheral  $\kappa$ -opioid receptor agonists as novel analgesics. *Chem. Pharm. Bull.* 65, 1085–1088.

Tajerian, M., and Clark, J.D. (2016). New Concepts in Complex Regional Pain Syndrome. *Hand Clin.* 32, 41–49.

Taylor, A.M.W., Roberts, K.W., Pradhan, A.A., Akbari, H.A., Walwyn, W., Lutfy, K., Carroll, F.I., Cahill, C.M., and Evans, C.J. (2015). Anti-nociception mediated by a  $\kappa$  opioid receptor agonist is blocked by a  $\delta$  receptor agonist. *Br. J. Pharmacol.* 172, 691–703.

Togashi, Y., Umeuchi, H., Okano, K., Ando, N., Yoshizawa, Y., Honda, T., Kawamura, K., Endoh, T., Utsumi, J., Kamei, J., et al. (2002). Antipruritic activity of the  $\kappa$ -opioid receptor agonist, TRK-820. *Eur. J. Pharmacol.* 435, 259–264.

Veldhuis, N.A., Poole, D.P., Grace, M., McIntyre, P., and Bunnett, N.W. (2015). The G protein-coupled receptor-transient receptor potential channel axis: Molecular insights for targeting disorders of sensation and inflammation. *Pharmacol. Rev.* 67, 36–73.

Vijay, A., Cavallo, D., Goldberg, A., de Laat, B., Nabulsi, N., Huang, Y., Krishnan-Sarin, S., and Morris, E.D. (2018). PET imaging reveals lower kappa opioid receptor availability in alcoholics but no effect of age. *Neuropsychopharmacology* 43, 2539–2547.

Von Voigtlander, P.F., and Lewis, R.A. (1982). U-50,488, a selective kappa opioid agonist: Comparison to other reputed kappa agonists. *Prog. Neuropsychopharmacol. Biol. Psychiatry* 6, 467–470.

Wang, F., Flanagan, J., Su, N., Wang, L.C., Bui, S., Nielson, A., Wu, X., Vo, H.T., Ma, X.J., and Luo, Y. (2012). RNAscope: A novel in situ RNA analysis platform for formalin-fixed, paraffin-embedded tissues. *J. Mol. Diagnostics* 14, 22–29.

Wei, H., Wu, H.Y., Fan, H., Li, T.F., Ma, A.N., Li, X.Y., Wang, Y.X., and Pertovaara, A. (2016). Potential role of spinal TRPA1 channels in antinociceptive tolerance to spinally administered morphine. *Pharmacol. Reports* 68, 472–475.

Wilbarger, J.L., and Cook, D.B. (2011). Multisensory hypersensitivity in women with fibromyalgia: Implications for well being and intervention. *Arch. Phys. Med. Rehabil.* 92, 653–656.

Williams, J.T., Ingram, S.L., Henderson, G., Chavkin, C., von Zastrow, M., Schulz, S., Koch, T., Evans, C.J., and Christie, M.J. (2013). Regulation of  $\mu$ -opioid receptors: Desensitization, phosphorylation, internalization, and tolerance. *Pharmacol. Rev.* 65, 223–254.

Yalcin, I., Charlet, A., Freund-Mercier, M.J., Barrot, M., and Poisbeau, P. (2009). Differentiating Thermal Allodynia and Hyperalgesia Using Dynamic Hot and Cold Plate in Rodents. *J. Pain* 10, 767–773.

Zhang, Q., Schäfer, M., Elde, R., and Stein, C. (1998). Effects of neurotoxins and hindpaw inflammation on opioid receptor immunoreactivities in dorsal root ganglia. *Neuroscience* 85, 281–291.

Figure 1

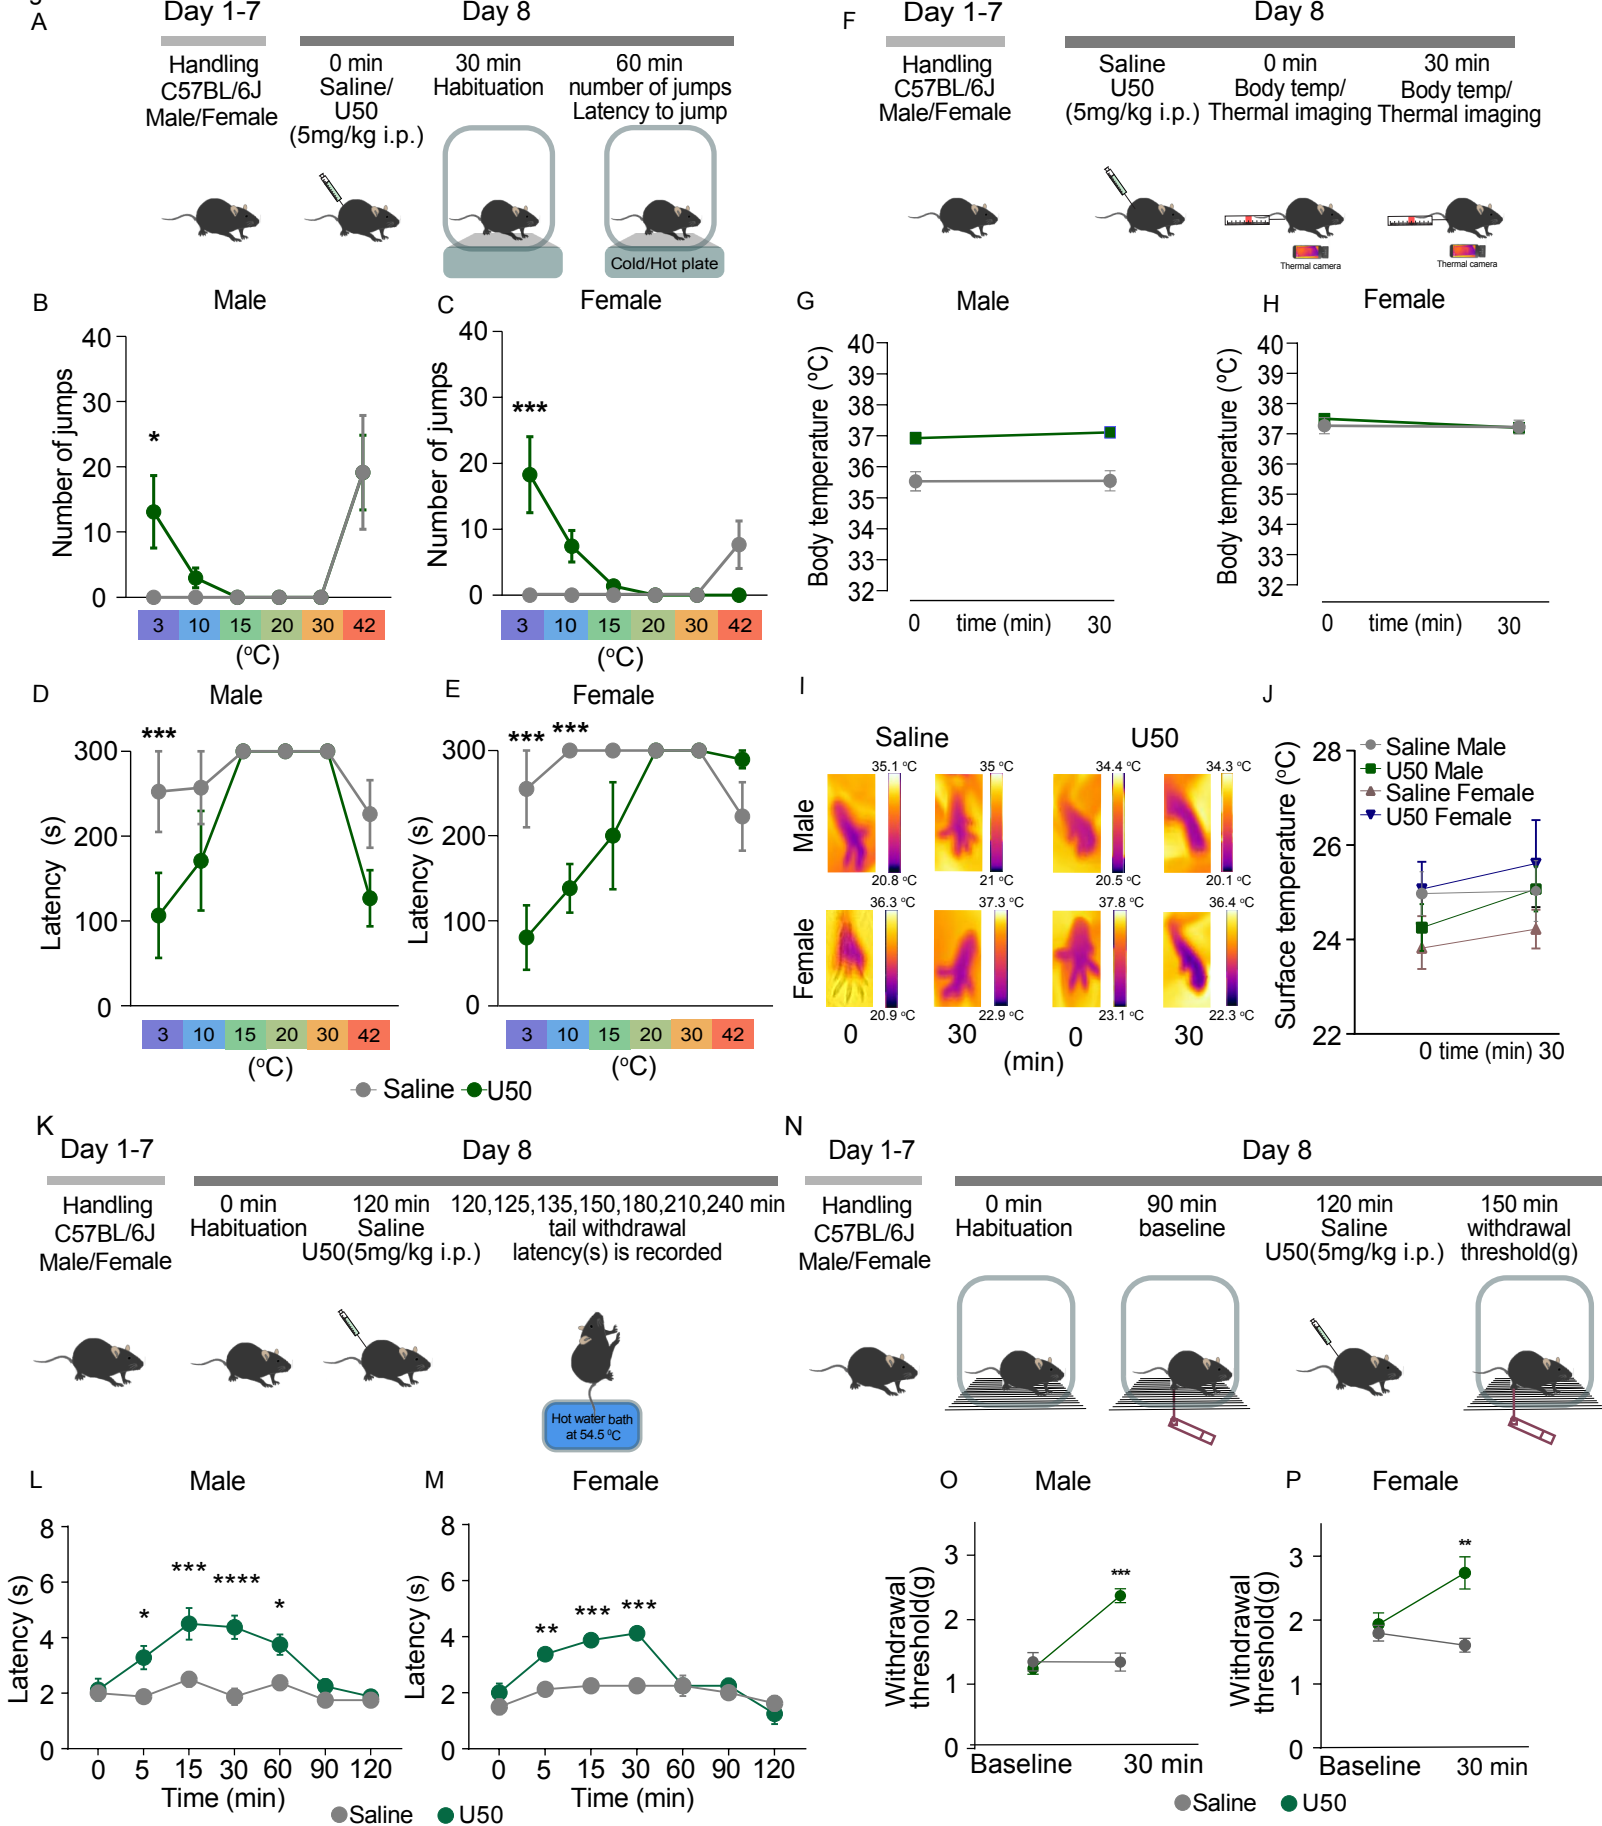

## Figure 1: KOR-induces hypersensitivity at 3°C

A) Outline of the experimental procedure. WT mice were injected with either saline or U50 (KOR agonist, 5 mg/kg, i.p.) 7 days post-handling. Post injection mice were exposed to cold/hot plate assay across a range of temperatures 3°C, 10°C, 15°C, 20°C, 30°C, 42°C.

B) In males, KOR agonist U50 (5mg/kg i.p.) significantly increased the number of jumps compared to controls at 3°C. Nonparametric mixed effects analysis (two-way ANOVA) revealed temperature effect  $F_{(5, 52)} = 8.92$  followed by Sidak's *post-hoc* test ( $*P < 0.05$  vs. respective saline treatment). Data are presented as mean  $\pm$  SEM; n = 5-7/group.

C) In females, KOR agonist U50 (5mg/kg i.p.) significantly increased the number of jumps compared to controls at 3°C. Nonparametric mixed effects analysis (two-way ANOVA) revealed temperature effect  $F_{(5, 57)} = 3.937$ , treatment effect  $F_{(1, 57)} = 4.956$  and a treatment x temperature  $F_{(5, 57)} = 6.191$  followed by Sidak's *post-hoc* test ( $***P < 0.001$  vs respective saline treatment). Data are presented as mean  $\pm$  SEM; n = 5-7/group.

D) Latency to jump following KOR activation is decreased in males at 3°C only. Nonparametric mixed effects analysis (two-way ANOVA) revealed temperature effect  $F_{(5, 53)} = 4.792$ , treatment effect  $F_{(1, 53)} = 8.665$  and a treatment x temperature  $F_{(5, 53)} = 2.446$  followed by Sidak's *post-hoc* test ( $***P < 0.001$  vs respective saline treatment). Data are presented as mean  $\pm$  SEM; n = 5-7/group.

E) Latency to jump following KOR activation is decreased in females at 3°C and 10°C; Nonparametric mixed effects analysis (two-way ANOVA) revealed temperature effect  $F_{(5, 30)} = 5.917$ , treatment effect  $F_{(1, 29)} = 14.82$  and a treatment x temperature  $F_{(5, 29)} = 6.722$  followed by Sidak's *post-hoc* test ( $***P < 0.001$  vs respective saline treatment). Data are presented as mean  $\pm$  SEM; n = 5-7/group.

F) Outline of the experimental procedure. Timeline of the assay, wherein mice are habituated, baseline rectal temperature is measured along with thermal imaging of paw surface temperatures, followed by systemic injections of saline or U50 and post-treatment temperatures were recorded.

G) KOR agonist U50 did not alter core body temperature 30 min post drug administration in males. Data are expressed as mean $\pm$ SEM; n=6-10/group.

H) KOR agonist U50 did not affect core body temperature 30 mins post drug administration in females. Data are expressed as mean $\pm$ SEM; n=6-10/group.

I) Representative infrared images from right hind paws of a male and female mouse using FLIR infrared camera pre-and post-saline/U50 administration.

J) KOR agonist U50 did not alter paw surface temperatures in males and females. Data are expressed as mean $\pm$ SEM; n=4/group.

K) Outline of experimental procedure, WT mice were injected with either saline or U50 (KOR agonist, 5 mg/kg, i.p.) 7 days post-handling. Post injection mice were exposed to tail withdrawal assay at 0 mins, 15 mins, 30 mins, 60 mins, 90 mins and 120 mins.

L) U50-mediated antinociception in males, parametric repeated measures ANOVA (two-way ANOVA) revealed time effect  $F_{(6, 97)} = 4.054$ , dose effect  $F_{(6, 97)} = 8.036$  and time x dose effect  $F_{(1, 97)} = 42.85$  followed by Sidak's *post-hoc* test (\* $P < 0.05$ , \*\* $P < 0.01$  \*\*\* $P < 0.001$  vs respective saline treatment). Data are expressed as mean  $\pm$  SEM; n=7-8/group.

M) U50-mediated antinociception in females, parametric repeated measures ANOVA (two-way ANOVA) revealed time effect  $F_{(6, 98)} = 5.620$ , dose effect  $F_{(6, 98)} = 13.33$  and time x dose effect  $F_{(1, 98)} = 28.63$  followed by Sidak's *post-hoc* test (\*\* $P < 0.01$  \*\*\* $P < 0.001$  vs respective saline treatment). Data are expressed as mean  $\pm$  SEM; n=7-8/group.

N) Timeline of experimental procedures for von Frey assay, mice were habituated and baseline withdrawal threshold was scored, followed by systemic injection of saline or U50 (KOR agonist, 5 mg/kg, i.p.). 30 mins post-treatment response to mechanical stimulus was again recorded.

O) U50 blocked mechanical sensitivity in males, parametric repeated measures ANOVA (two-way ANOVA) revealed time effect  $F_{(1, 15)} = 36$ , dose-effect  $F_{(1, 15)} = 10.96$  and time x dose-effect  $F_{(1, 15)} = 36.54$  followed by Sidak's *post-hoc* test (\*\*\* $P < 0.001$  vs. respective saline treatment). Data are expressed as mean  $\pm$  SEM; n=6-8/group.

P) U50 blocked mechanical sensitivity in females, parametric repeated measures ANOVA (two-way ANOVA) revealed dose-effect  $F_{(1, 12)} = 15.26$  and time X dose-effect  $F_{(1, 12)} = 5.127$  followed by Sidak's *post-hoc* test \*\* $P < 0.001$  vs. respective saline treatment at 30 mins). Data are expressed as mean  $\pm$  SEM; n=6-8/group.

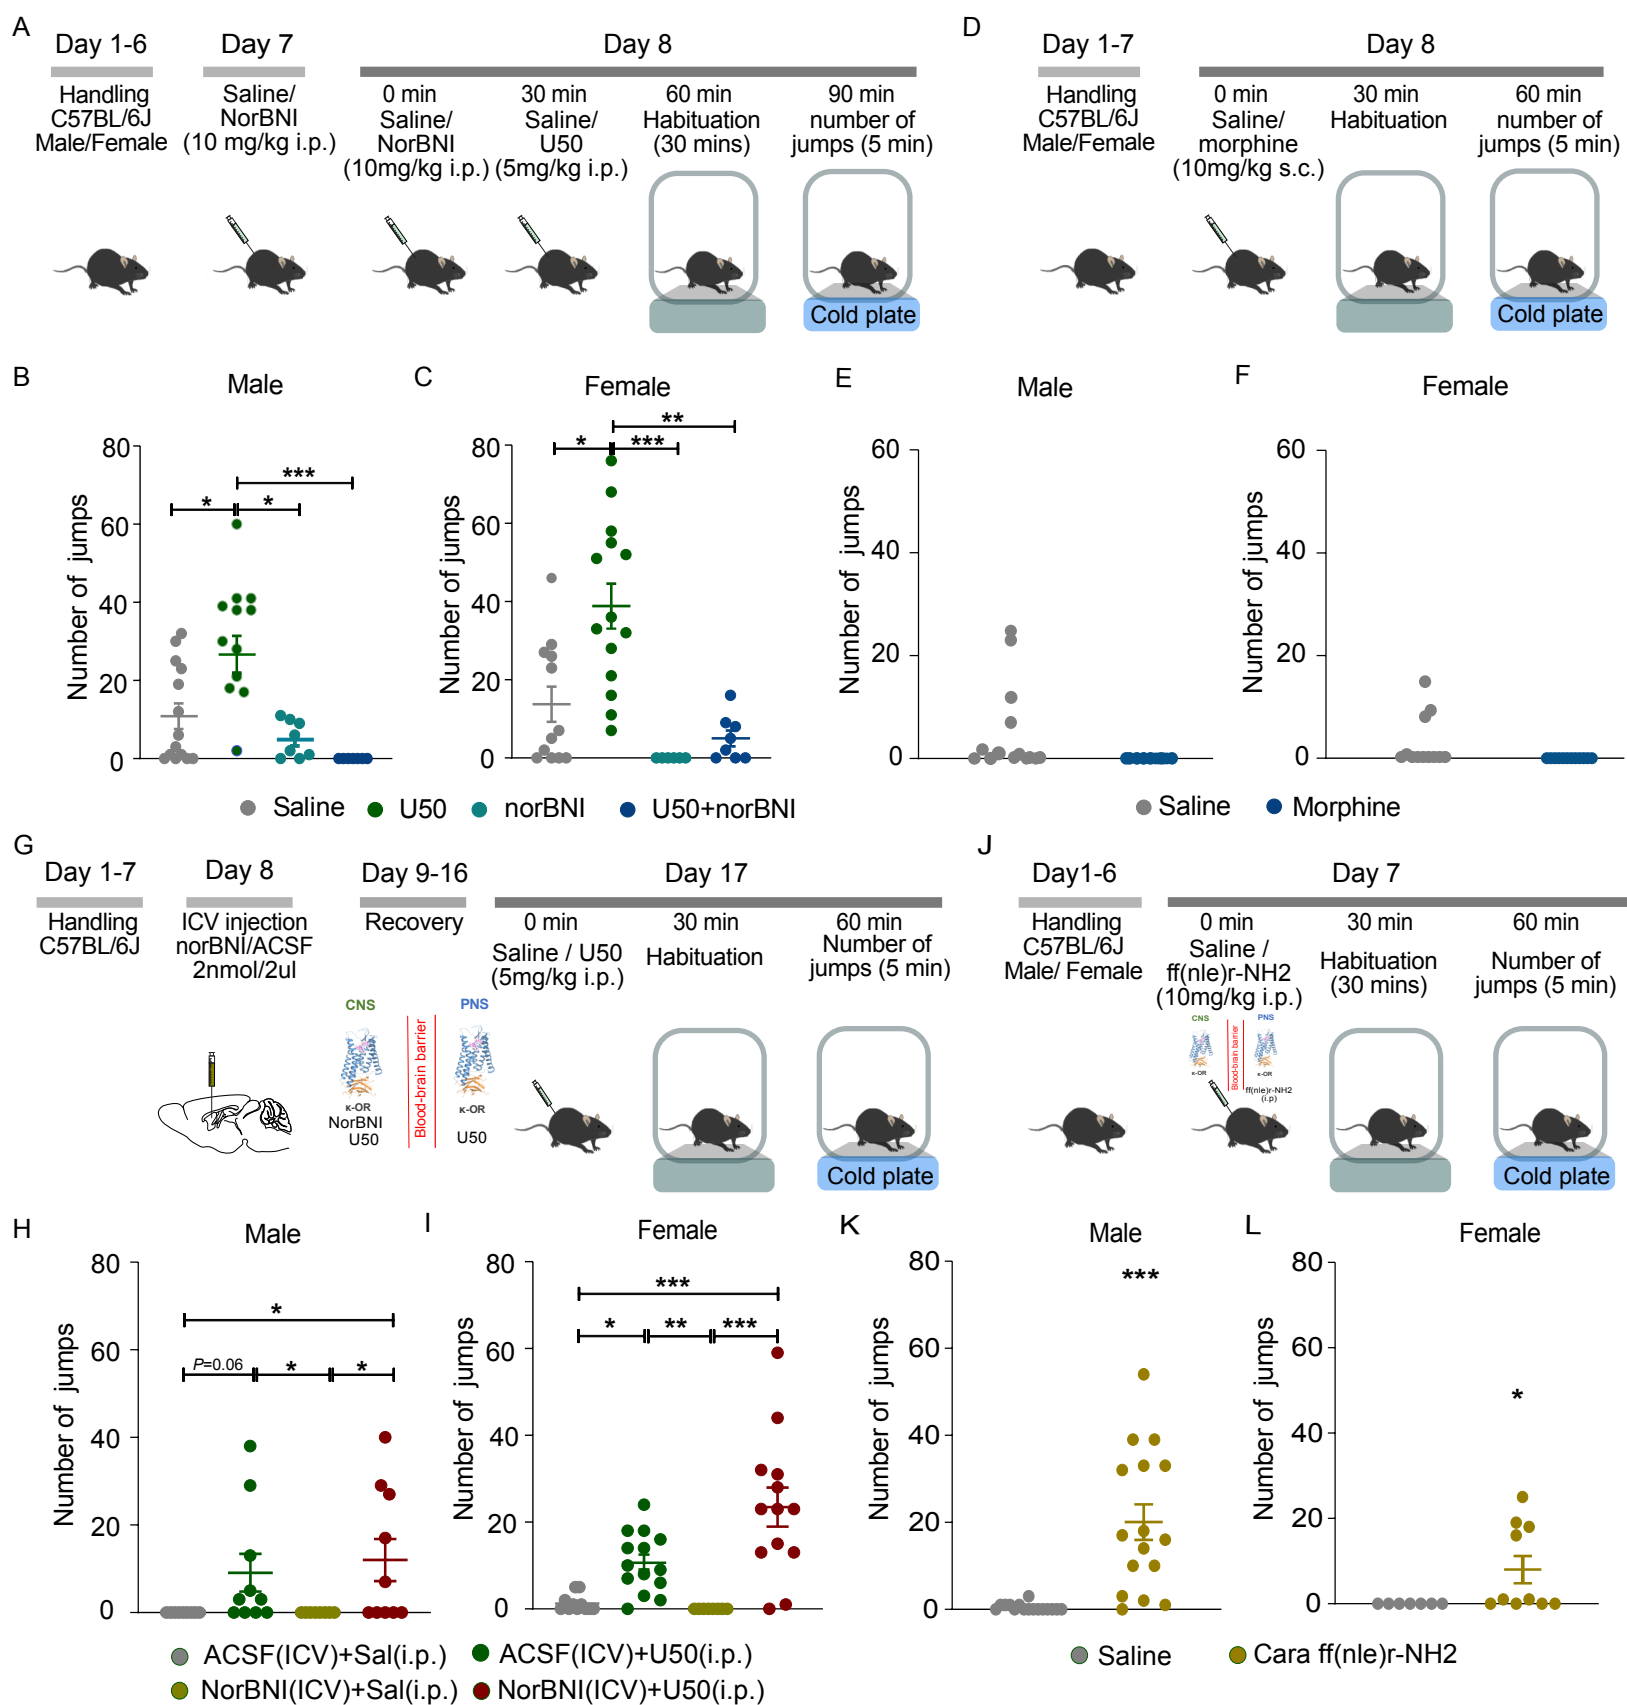



## Figure 2: Potentiation of cold hypersensitivity is KOR selective

A) Outline of the experimental procedure. Timeline of the systemic injections of saline, U50, or norBNI, followed by habituation and cold plate assay at 3°C.

B) In males, activation of KOR by U50 significantly increased the number of jumps on a 3°C cold plate. Kruskal-Wallis test revealed treatment effect  $H = 23.35$  followed by Dunn's *post-hoc* test (U50 vs. Saline  $*P < 0.05$ ). KOR antagonism with norBNI blocked cold hypersensitivity on a cold plate at 3°C (U50 vs U50+norBNI  $***P < 0.001$ ). Data are presented as mean±SEM n=8-14/group.

C) In females, activation of KOR by U50 significantly increased the number of jumps on a 3°C cold plate. Kruskal-Wallis test revealed treatment effect  $H = 23.28$  followed by Dunn's *post-hoc* analysis (U50 vs. Saline  $*P < 0.05$ ). KOR antagonism with norBNI blocked cold hypersensitivity on a cold plate at 3°C (U50 vs U50+norBNI  $**P < 0.01$ ). Data are presented as mean±SEM n=8-14/group.

D) Outline of the experimental procedure. Timeline of the systemic injections of morphine, followed by habituation, and cold plate assay at 3°C.

E) Morphine did not affect cold sensitivity in males. Data are expressed as mean±SEM; n=10-12/group.

F) Morphine did not affect cold sensitivity in females. Data are expressed as mean±SEM; n=10-12/group.

G) Outline of the experimental procedure. Timeline of the ICV injections (NorBNI or aCSF), followed by habituation, systemic U50, or saline injections followed by cold plate assay at 3°C.

H) In males, mice infused with aCSF (ICV) and injected with U50 (i.p.) showed cold hypersensitivity, as compared to the control group on 3°C cold plate assay. Kruskal-Wallis test revealed treatment effect  $H = 12.45$  followed by Dunn's *post-hoc* analysis. (aCSF(ICV)+U50(i.p.) vs aCSF(ICV)+saline(i.p.)  $P = 0.06$ ). Central KOR antagonism with norBNI had no effect on cold hypersensitivity in males on a cold plate at 3°C (aCSF(ICV)+saline(i.p.) vs. norBNI (ICV)+U50(i.p.)  $*P < 0.05$ ). Central KOR antagonism without peripheral activation has shown no cold hypersensitivity on a cold plate at 3°C (norBNI(ICV)+saline (i.p.) vs. norBNI (ICV)+U50(i.p.)  $*P < 0.05$ ). Data are presented as mean±SEM n=8-14/group.

I) In females, mice infused with aCSF(ICV) and U50 (i.p.) showed cold hypersensitivity, as compared to the control group on 3°C cold plate assay. Kruskal-Wallis test revealed treatment effect  $H = 28.67$  followed by Dunn's *post-hoc* analysis (aCSF(ICV)+U50 (i.p.) vs aCSF(ICV)+saline(i.p.)  $*P < 0.05$ ). Central KOR antagonism with norBNI, had no effect on cold hypersensitivity in females on a cold plate at 3°C (aCSF(ICV)+saline (i.p.) vs. norBNI(ICV)+U50(i.p.)  $***P < 0.01$ ). Central KOR antagonism without peripheral activation has shown no cold hypersensitivity on a cold plate at 3°C (norBNI(ICV)+saline (i.p.) vs. norBNI(ICV)+U50(i.p.)  $**P < 0.01$ ). Data are presented as mean±SEM n=8-14/group.

J) Outline of the experimental procedure. Timeline of the systemic injections of saline or ffr-NH2 (10mg/kg i.p.), followed by habituation and cold plate assay at 3°C.

(K) Peripherally restricted agonist ffr-NH2 (10mg/kg i.p.) significantly increased jumping on the cold plate at 3°C, compared to controls, in males.. Mann-Whitney U test revealed a treatment effect (Males- saline (i.p.) vs. ff(nlr)r-NH2 (i.p.) \*\*\* $P < 0.001$ ). Data expressed as mean $\pm$ SEM n=7-16/group.

L) Peripherally restricted agonist ffr-NH2 (10mg/kg i.p.) significantly increased jumping on the cold plate at 3°C, compared to controls, in females. Mann-Whitney U test revealed a treatment effect (females-saline (i.p.) vs. ff(nlr)r-NH2 (i.p.) \* $P < 0.05$ ). Data are presented as mean $\pm$ SEM n=7-16/group.

Figure 3

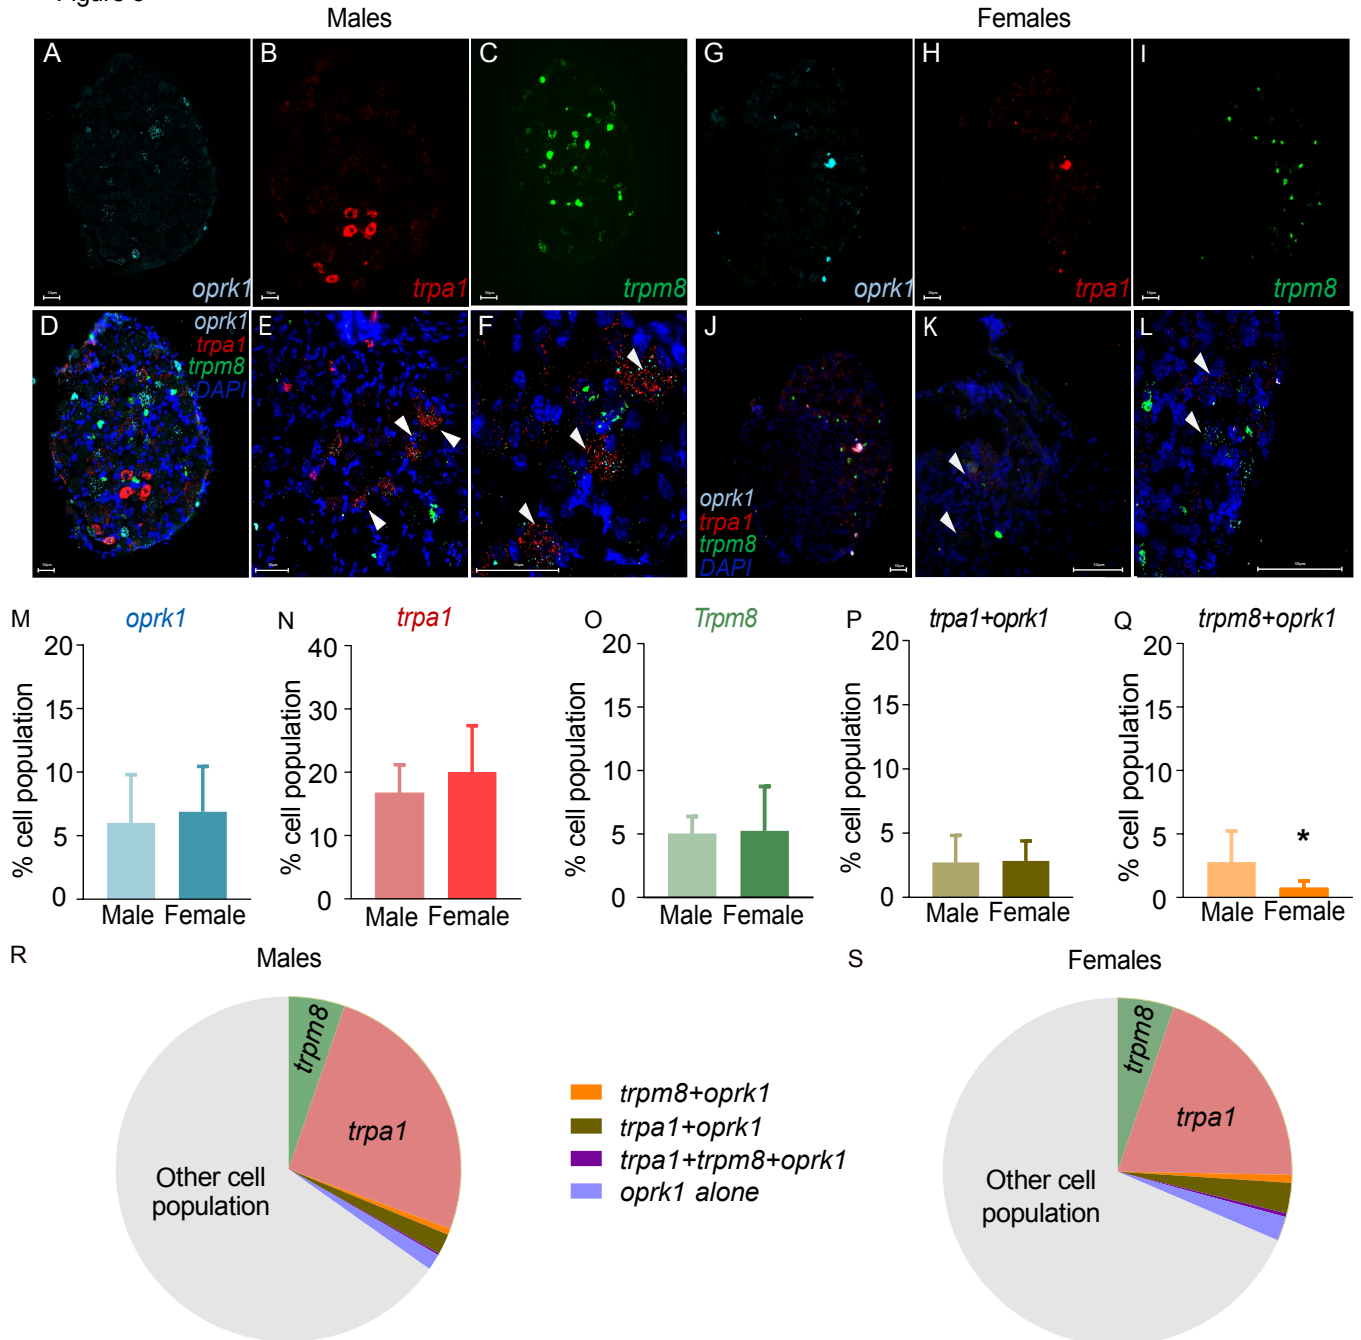

Figure 3: Transcripts for KOR, TRPA1, and TRPM8 are differentially co-localized in mouse DRG

A) Representative image of Fluorescent *in situ* hybridization in a DRG section for *oprk1* in male mice, shown in blue.

B) Representative image of Fluorescent *in situ* hybridization in a DRG section for *trpa1* in male mice, shown in red.

C) Representative image of Fluorescent *in situ* hybridization in a DRG section for *trpm8* transcripts in male mice, shown in green.

D) Representative image of Fluorescent *in situ* hybridization in a DRG section of all the three transcripts *oprk1*, *trpa1*, *trpm8* and DAPI in male mice.

E) Representative image showing colocalization of *oprk1* with *trpm8* and *trpa1* at 40x in male mice.

F) Representative image showing colocalization of *oprk1* with *trpm8* and *trpa1* at 100x in male mice.

G) Representative image of Fluorescent *in situ* hybridization in a DRG section for *oprk1* in female mice, shown in blue.

H) Representative image of Fluorescent *in situ* hybridization in a DRG section for *trpa1* in female mice, shown in red.

I) Representative image of Fluorescent *in situ* hybridization in a DRG section for *trpm8* transcripts in female mice, shown in green.

J) Fluorescent *in situ* hybridization of mice DRG sections of all the three transcripts and DAPI in female mice.

K) Representative image showing show the colocalization of *oprk1* with *trpm8* and *trpa1* at 40x in female mice.

L) Representative image showing colocalization of *oprk1* with *trpm8* and *trpa1* at 100x in female mice.

M) Expression of *oprk1* transcripts in female mice were similar to the male mice in DRG. Data are presented as mean±SEM; n=4/group.

N) Expression of *trpa1* transcripts in female mice were similar to the male mice in the DRG. Data are presented as mean±SEM; n=4/group.

O) Expression of *trpm8* transcripts in female mice were similar to the male mice in the DRG. Data are presented as mean±SEM; n=4/group.

P) No difference in colocalization of *oprk1+trpa1* transcripts in DRG between males and females. Data are presented as mean±SEM; n=4/group.

Q) Colocalization of *oprk1+trpm8* transcripts is higher in males compared to the females in the DRGs. Independent *t*-test analysis revealed a significant difference between males vs. females  $t_6 = 0.801$  \* $P < 0.05$ . Data are presented as mean±SEM; n=4/group.

R) Representation of *oprk1*, *trpm8*, *trpa1*, and co-expression of *trpa1* and *trpm8* transcripts with *oprk1* in male DRG. Data are presented as mean±SEM; n=4/group.

S) Representation of *oprk1*, *trpm8*, *trpa1*, and co-expression of *trpa1* and *trpm8* with *oprk1* transcripts in female DRG. Data are presented as mean±SEM; n=4/group.

Figure 4

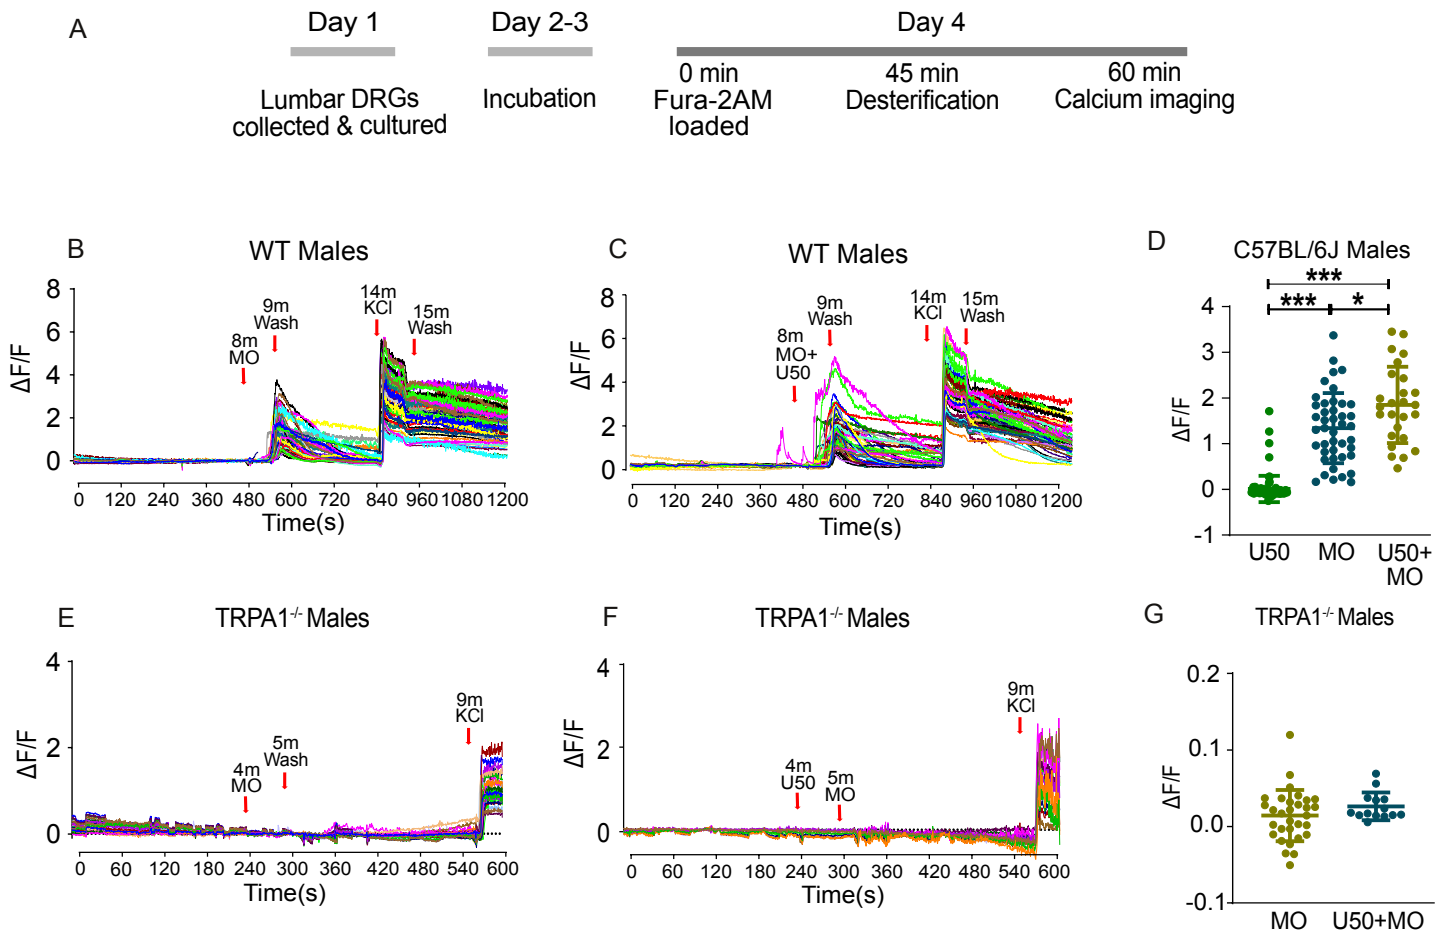

#### Figure 4: KOR activation potentiates TRPA1-dependent calcium signaling

A) Outline of the experimental procedure. Timeline of the dissection of lumbar DRG, followed by culturing and calcium imaging of DRG neurons.

B) Representative traces in male WT DRG cultures, showing an increased calcium response at 8 min following application of MO (100 $\mu$ M), followed by a wash period and another increased calcium response at 14 min following application of KCl. .

C) Representative traces in male WT DRG cultures, showing an increased calcium response at 8 min following application of U50+MO, followed by a wash with Tyrode's solution and another calcium response peak at 14 min following application of KCl.

D) U50+MO significantly potentiated calcium release as compared to MO alone. Independent *t*-test analysis revealed a significant difference between U50+MO vs. MO alone  $t_{67} = 2.57$  \* $P < 0.05$ . U50 treatment alone had no effect on the calcium response compared to MO alone and MO+U50 treatments. Independent *t*-test analysis revealed a significant difference between MO vs. U50  $t_{123} = 14.01$  \*\*\* $P < 0.001$ . Independent *t*-test analysis revealed a significant difference between MO+U50 vs. U50 alone treatments  $t_{106} = 17.15$  \*\*\* $P < 0.001$ . Data are presented as mean $\pm$ SEM; n= 26-82/group.

E) Representative traces in male *Trpa1*<sup>-/-</sup> DRG cultures, showing no change in calcium release at 4 min following application of MO (100 $\mu$ M), followed by a wash with Tyrode's solution and increased calcium release at 9 min following application of KCl.

F) Representative traces in male *Trpa1*<sup>-/-</sup> DRG cultures, showing no change in calcium release at 4 min following application of U50+MO, followed by a wash with Tyrode's solution and increased calcium release at 9 min following application of KCl.

G) No change in calcium release following MO alone and MO+U50 in *Trpa1*<sup>-/-</sup> DRG cultures. Data are expressed as mean $\pm$ SEM; n = 15-30/group.

Supplementary figure 1

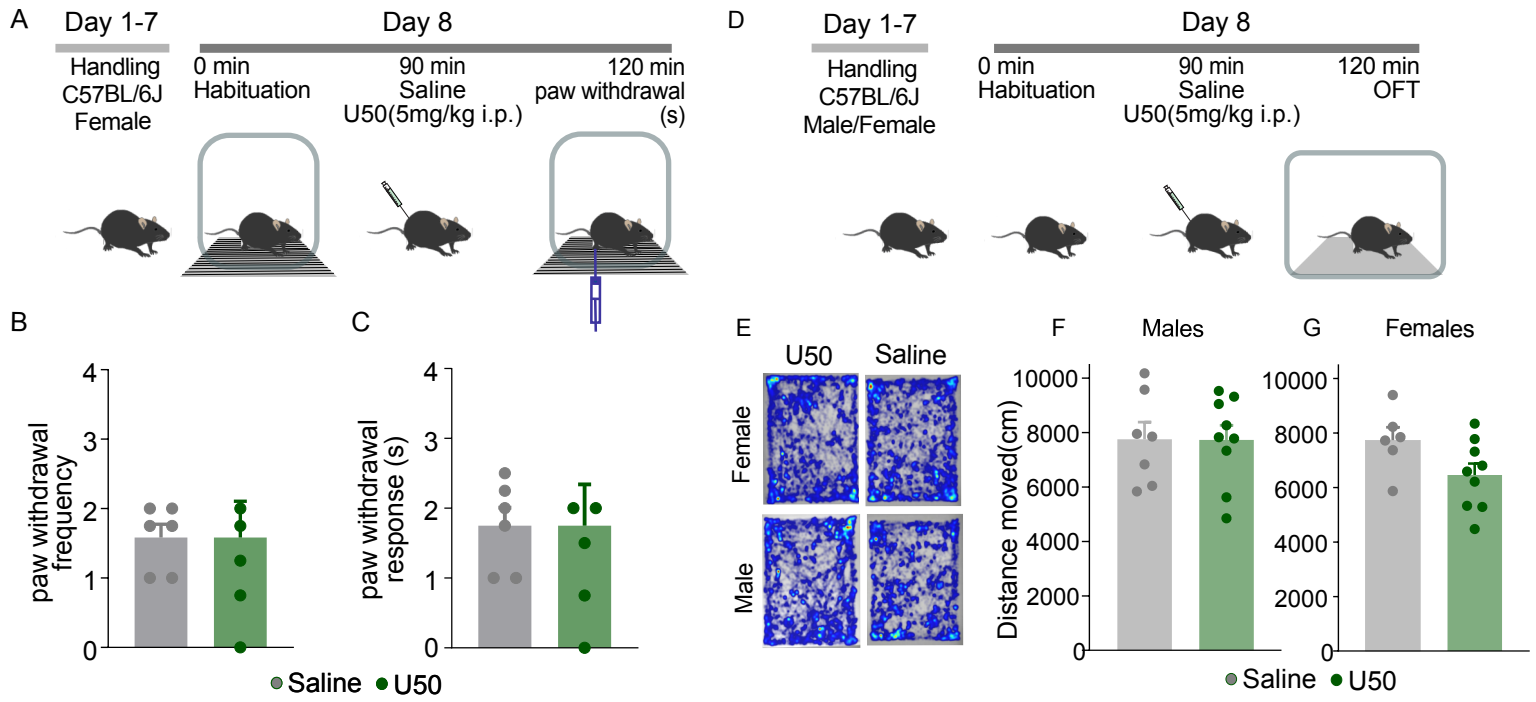



## Supplementary figure 1 (Figure S1)

A) Outline of the acetone evaporation test experimental procedure. Timeline of the systemic injections of U50, followed by habituation and acetone evaporation assay.

B) U50 had no effect on acetone-evoked aversive behavior, as compared to saline, in females. The acetone-evoked aversive behavior was measured by quantifying the nocifensive responses (scoring the paw withdrawal frequency). Data are expressed as mean $\pm$  SEM; n=5-6/group.

C) U50 had no effect on acetone-evoked aversive behavior, as compared to saline, in females. The acetone-evoked aversive behavior was measured by the duration of nocifensive response (scoring the latency of paw withdrawal response). Data are expressed as mean $\pm$  SEM; n=5-6/group.

D) Outline of the experimental procedure. Timeline of the open field test (OFT) assay, habituation followed systemic injections of saline or U50, and performing OFT.

E) Heat maps of treatment groups in OFT.

F) U50 had no sedative effect in the open field test in males. Data are expressed as mean $\pm$  SEM; n=6-9/group.

G) U50 had no sedative effect in the open field test in females. Data are expressed as mean $\pm$  SEM; n=6-9/group.
